# Supplementary material for: Characterization of a series of absolute isotope reference materials for magnesium: ab initio calibration of the mass spectrometers, and determination of isotopic compositions and relative atomic weights
Source: Royal Society of Chemistry journal article supplement (doi:10.1039/c6ja00013d), 2016-01-01
Supplement: c6ja00013d1.pdf [file c6ja00013d1.pdf]

Cite this: DOI: 10.1039/c0xx00000x

PAPER

www.rsc.org/xxxxxx

# Characterization of a New Absolute Isotope Reference Material for Magnesium: *ab initio* Calibration of the Mass Spectrometers, and Determination of Isotopic Compositions and Relative Atomic Weights – ELECTRONIC SUPPLEMENT

5 Jochen Vogl<sup>\*a</sup>, Björn Brandt<sup>a</sup>, Janine Noordmann<sup>b</sup>, Olaf Rienitz<sup>b</sup>, and Dmitriy Malinovskiy<sup>c</sup>

Received 1<sup>st</sup> May 2015, Accepted 2<sup>nd</sup> May 2015

DOI: 10.1039/b000000x

## S1 Preparation of Candidate Solutions

10 Setup calculations and the actual setup for the preparation of the three candidates ERM-AE143, -AE144 and -AE145 are shown in Table S1.

**Table S1** Initial Dissolution of the magnesium IRM candidates<sup>a</sup>.

|                                                        | Cand. ERM-AE143 | Cand. ERM-AE144 | Cand. ERM-AE145 <sup>d</sup> |
|--------------------------------------------------------|-----------------|-----------------|------------------------------|
| Mass PFA bottle / g, <i>N</i> = 10                     | 314.38593       | 330.51866       | 67.78299                     |
| Mass of Mg metal / g, <i>N</i> = 10                    | 2.14347825      | 2.019622        | 0.1780076                    |
| Setup calculations                                     |                 |                 |                              |
| Mg target mass fraction / (μg/g)                       | 1000            | 1000            | 2000                         |
| Target mass of solution / g                            | 2143.478        | 2019.622        | 89.004                       |
| HNO <sub>3</sub> target mass fraction / (g/g)          | 0.020           | 0.020           | 0.015                        |
| Required HNO <sub>3</sub> for dissolution / g          | 11.1143         | 10.4721         | 0.9230                       |
| Required HNO <sub>3</sub> in final sol. / g            | 42.8696         | 40.3924         | 0.8900                       |
| Sum required mass of HNO <sub>3</sub> / g              | 53.9839         | 50.8646         | 2.2581                       |
| Mass fraction <sup>a</sup> of HNO <sub>3</sub> / (g/g) | 0.060001        | 0.060001        | 0.059979                     |
| Required mass 0.06 g/g HNO <sub>3</sub> / g            | 899.7123        | 847.7244        | 37.6482                      |
| Actual setup, HNO <sub>3</sub> addition                |                 |                 |                              |
| Mass of 0.06 g/g HNO <sub>3</sub> / g                  | 900.0460        | 848.1654        | 37.698405                    |
| Mass fraction <sup>a</sup> of HNO <sub>3</sub> / (g/g) | 0.060001        | 0.060001        | 0.059979                     |
| Mass of HNO <sub>3</sub> added / g                     | 54.0039         | 50.8910         | 2.261113                     |
| Mass HNO <sub>3</sub> after digestion / g <sup>b</sup> | 899.5104        | 847.8193        | 37.673497                    |
| Obs. total mass loss / g                               | 0.5356          | 0.3461          | 0.0249                       |
| Expected mass loss due to H <sub>2</sub> / g           | 0.1778          | 0.1675          | 0.0148                       |
| Obs. additional mass loss / g <sup>c</sup>             | 0.3578          | 0.1786          | 0.0101                       |
| Actual setup, fill-up with water                       |                 |                 |                              |
| Mass of water added / g                                | 1243.6238       | 1170.8520       | 51.30                        |
| Total mass of solution / g                             | 2145.2723       | 2020.7119       | 89.8900                      |
| Mg mass fraction / (mg/kg)                             | 999.16          | 999.46          | 1995.80 <sup>d</sup>         |
| Remaining HNO <sub>3</sub> / g                         | 42.8896         | 40.4189         | 1.3381                       |
| HNO <sub>3</sub> mass fraction / (g/g)                 | 0.019993        | 0.020002        | 0.015003 <sup>d</sup>        |

<sup>a</sup> ERM-AE145 was dissolved first to test the dissolution conditions;

15 ERM-AE143 and -AE144 were dissolved separately.

<sup>b</sup> Mass of solution after digestion, minus the mass of magnesium.

<sup>c</sup> Mass difference between acid filled in, and mass of acid determined later, minus the calculated stoichiometric mass loss due to H<sub>2</sub> formation.

<sup>d</sup> Note: this initial solution was later transferred into a solution of 0.02 g/g HNO<sub>3</sub> by adding 0.509 mL of conc. HNO<sub>3</sub> (0.65 g/g), for details see text.

## S2 Raw Data

A number of individual calibration sequences were measured and evaluated. One sequence (“-1b-3”, BAM) is evaluated as an example in this paper to demonstrate the procedure. Table S01 compiles the blank corrected raw data from all runs, both signal intensity as well as signal ratios.

**Table S2a** Blank-corrected data, sample sequence (BAM, “-1b-3”). Part a): Drift standard initial measurement and IRM candidates.

| Run #                                      | Sample (iteration) | <i>R</i> (25/24) / (V/V) | <i>R</i> (26/24) / (V/V) |
|--------------------------------------------|--------------------|--------------------------|--------------------------|
| <b>Drift standard, initial measurement</b> |                    |                          |                          |
| 3                                          | Standard, 1        | 0.1355317                | 0.1593208                |
| 6                                          | 2                  | 0.1355302                | 0.1593149                |
| 9                                          | 3                  | 0.1355206                | 0.1592927                |
| 12                                         | 4                  | 0.1355152                | 0.1592767                |
| 15                                         | 5                  | 0.1355100                | 0.1592672                |
| <b>Candidate 3</b>                         |                    |                          |                          |
| 18                                         | Candidate 3, 1     | 0.1355250                | 0.1592997                |
| 21                                         | 2                  | 0.1355243                | 0.1592904                |
| 24                                         | 3                  | 0.1355214                | 0.1592832                |
| 27                                         | 4                  | 0.1355139                | 0.1592727                |
| 30                                         | 5                  | 0.1355114                | 0.1592632                |
| <b>Drift standard</b>                      |                    |                          |                          |
| 33                                         | Standard, 6        | 0.1354859                | 0.1592074                |
| <b>Candidate 2</b>                         |                    |                          |                          |
| 36                                         | Candidate 2, 1     | 0.1354835                | 0.1592040                |
| 39                                         | 2                  | 0.1354784                | 0.1591979                |
| 42                                         | 3                  | 0.1354760                | 0.1591918                |
| 45                                         | 4                  | 0.1354727                | 0.1591848                |
| 48                                         | 5                  | 0.1354717                | 0.1591828                |
| <b>Drift standard</b>                      |                    |                          |                          |
| 51                                         | Standard, 7        | 0.1354690                | 0.1591728                |
| <b>Candidate 1</b>                         |                    |                          |                          |
| 54                                         | Candidate 1, 1     | 0.1355822                | 0.1594348                |
| 57                                         | 2                  | 0.1355762                | 0.1594263                |
| 60                                         | 3                  | 0.1355803                | 0.1594290                |
| 63                                         | 4                  | 0.1355738                | 0.1594159                |
| 66                                         | 5                  | 0.1355712                | 0.1594170                |
| <b>Drift standard</b>                      |                    |                          |                          |
| 69                                         | Standard, 8        | 0.1354621                | 0.1591555                |

This data is the result of an outlier test, and the subtraction of blank values (after removal of outliers), from the individual cycles of the runs (50 before outlier removal, max. 11 outliers found in test sequence – typically less than 5 per cycle). The signal ratios were then drift-corrected; Table S02 compiles the results after drift correction for all runs. This data is the basis for the averaged data and standard uncertainties, which are fed into the evaluation (see table 05 in the main part)

5  
10 **Table S2b** Blank-corrected data, sample sequence (BAM, “-1b-3”). Part b): Calibration mixtures and intermediate drift standards.

| Run #                                    | Sample (iteration) | $R(25/24) / (V/V)$ | $R(26/24) / (V/V)$ |
|------------------------------------------|--------------------|--------------------|--------------------|
| <b>Drift standard</b>                    |                    |                    |                    |
| 69                                       | Standard, 8        | See Table 01a      |                    |
| <b>Calibration mixtures “24”+“25”-1b</b> |                    |                    |                    |
| 72                                       | “24”+“25”-1b, 1    | 1.009878           | 0.0037220          |
| 75                                       | 2                  | 1.009846           | 0.0037205          |
| 78                                       | 3                  | 1.009841           | 0.0037191          |
| 81                                       | 4                  | 1.009888           | 0.0037107          |
| 84                                       | 5                  | 1.009869           | 0.0037096          |
| <b>Drift standard</b>                    |                    |                    |                    |
| 87                                       | Standard, 9        | 0.1354514          | 0.1591328          |
| 90                                       | Standard, 10       | 0.1354513          | 0.1591318          |
| <b>Calibration mixtures “25”+“26”-1b</b> |                    |                    |                    |
| 93                                       | “25”+“26”-1b, 1    | 46.432             | 51.249             |
| 96                                       | 2                  | 46.425             | 51.241             |
| 99                                       | 3                  | 46.423             | 51.238             |
| 102                                      | 4                  | 46.421             | 51.235             |
| 105                                      | 5                  | 46.410             | 51.223             |
| <b>Drift standard</b>                    |                    |                    |                    |
| 108                                      | Standard, 11       | 0.1354351          | 0.1591073          |
| 111                                      | Standard, 12       | 0.1354397          | 0.1591071          |
| <b>Calibration mixtures “24”+“26”-1b</b> |                    |                    |                    |
| 114                                      | “24”+“26”-1b, 1    | 0.0022684          | 1.022096           |
| 117                                      | 2                  | 0.0022723          | 1.022008           |
| 120                                      | 3                  | 0.0022724          | 1.022030           |
| 123                                      | 4                  | 0.0022693          | 1.021973           |
| 126                                      | 5                  | 0.0022705          | 1.021986           |
| <b>Drift standard</b>                    |                    |                    |                    |
| 129                                      | Standard, 13       | 0.1354325          | 0.1590916          |

**Table S2c** Blank-corrected data, sample sequence (BAM, “-1b-3”). Part b): Isotopically enriched materials and intermediate drift standards.

| Run #                         | Sample (iteration) | $R(25/24) / (V/V)$ | $R(26/24) / (V/V)$ |
|-------------------------------|--------------------|--------------------|--------------------|
| <b>Drift standard</b>         |                    |                    |                    |
| 132                           | Standard, 14       | 0.1354370          | 0.1590974          |
| <b>Enriched material “24”</b> |                    |                    |                    |
| 135                           | “24”-1b, 1         | 0.0008386          | 0.0007491          |
| 138                           | 2                  | 0.0008404          | 0.0007516          |
| 141                           | 3                  | 0.0008398          | 0.0007515          |
| 144                           | 4                  | 0.0008438          | 0.0007559          |
| 147                           | 5                  | 0.0008437          | 0.0007555          |
| <b>Drift standard</b>         |                    |                    |                    |
| 150                           | Standard, 15       | 0.1354268          | 0.1590791          |
| 153                           | Standard, 16       | 0.1354263          | 0.1590728          |
| <b>Enriched material “25”</b> |                    |                    |                    |
| 156                           | “25”-1b, 1         | 56.961             | 0.168625           |
| 159                           | 2                  | 56.966             | 0.168628           |
| 162                           | 3                  | 56.966             | 0.168607           |
| 165                           | 4                  | 56.990             | 0.168554           |
| 168                           | 5                  | 56.970             | 0.168602           |
| <b>Drift standard</b>         |                    |                    |                    |
| 171                           | Standard, 17       | 0.1354211          | 0.1590654          |
| 174                           | Standard, 18       | 0.1354202          | 0.1590575          |
| <b>Enriched material “26”</b> |                    |                    |                    |
| 177                           | “26”-1b, 1         | 0.38728            | 274.34             |
| 180                           | 2                  | 0.38646            | 273.95             |
| 183                           | 3                  | 0.38645            | 273.92             |
| 186                           | 4                  | 0.38638            | 273.71             |
| 189                           | 5                  | 0.38635            | 273.86             |
| <b>Drift standard</b>         |                    |                    |                    |
| 192                           | Standard, 19       | 0.1354154          | 0.1590597          |
| 195                           | Standard, 20       | 0.1354161          | 0.1590537          |

**Table S3** Drift-corrected data, sample sequence (BAM, “-1b-3”), based on data in tables S1a to S1c.

| Run #                                    | Sample (iteration) | $R(25/24) / (V/V)$ | $R(26/24) / (V/V)$ |
|------------------------------------------|--------------------|--------------------|--------------------|
| <b>Candidate 3</b>                       |                    |                    |                    |
| 18                                       | Candidate 3, 1     | 0.1355406          | 0.1593370          |
| 21                                       | 2                  | 0.1355439          | 0.1593377          |
| 24                                       | 3                  | 0.1355450          | 0.1593404          |
| 27                                       | 4                  | 0.1355415          | 0.1593399          |
| 30                                       | 5                  | 0.1355430          | 0.1593403          |
| <b>Candidate 2</b>                       |                    |                    |                    |
| 36                                       | Candidate 2, 1     | 0.13552192         | 0.15929689         |
| 39                                       | 2                  | 0.13551970         | 0.15929653         |
| 42                                       | 3                  | 0.13552012         | 0.15929617         |
| 45                                       | 4                  | 0.13551963         | 0.15929497         |
| 48                                       | 5                  | 0.13552145         | 0.15929869         |
| <b>Candidate 1</b>                       |                    |                    |                    |
| 54                                       | Candidate 1, 1     | 0.1356359          | 0.1595596          |
| 57                                       | 2                  | 0.1356311          | 0.1595539          |
| 60                                       | 3                  | 0.1356363          | 0.1595595          |
| 63                                       | 4                  | 0.1356310          | 0.1595494          |
| 66                                       | 5                  | 0.1356295          | 0.1595533          |
| <b>Calibration mixtures “24”+“25”-1b</b> |                    |                    |                    |
| 72                                       | “24”+“25”-1b, 1    | 1.010334           | 0.0037254          |
| 75                                       | 2                  | 1.010315           | 0.0037239          |
| 78                                       | 3                  | 1.010323           | 0.0037227          |
| 81                                       | 4                  | 1.010384           | 0.0037143          |
| 84                                       | 5                  | 1.010378           | 0.0037132          |
| <b>Calibration mixtures “25”+“26”-1b</b> |                    |                    |                    |
| 93                                       | “25”+“26”-1b, 1    | 46.4571            | 51.3029            |
| 96                                       | 2                  | 46.4511            | 51.2959            |
| 99                                       | 3                  | 46.4502            | 51.2945            |
| 102                                      | 4                  | 46.4486            | 51.2929            |
| 105                                      | 5                  | 46.4383            | 51.2817            |
| <b>Calibration mixtures “24”+“26”-1b</b> |                    |                    |                    |
| 114                                      | “24”+“26”-1b, 1    | 0.0022698          | 1.023316           |
| 117                                      | 2                  | 0.0022737          | 1.023245           |
| 120                                      | 3                  | 0.0022738          | 1.023283           |
| 123                                      | 4                  | 0.0022707          | 1.023244           |
| 126                                      | 5                  | 0.0022719          | 1.023273           |
| <b>Enriched material “24”</b>            |                    |                    |                    |
| 135                                      | “24”-1b, 1         | 0.0008391          | 0.0007500          |
| 138                                      | 2                  | 0.0008410          | 0.0007526          |
| 141                                      | 3                  | 0.0008403          | 0.0007525          |
| 144                                      | 4                  | 0.0008443          | 0.0007569          |
| 147                                      | 5                  | 0.0008443          | 0.0007565          |
| <b>Enriched material “25”</b>            |                    |                    |                    |
| 156                                      | “25”-1b, 1         | 57.0012            | 0.168862           |
| 159                                      | 2                  | 57.0069            | 0.168865           |
| 162                                      | 3                  | 57.0072            | 0.168846           |
| 165                                      | 4                  | 57.0315            | 0.168794           |
| 168                                      | 5                  | 57.0120            | 0.168843           |
| <b>Enriched material “26”</b>            |                    |                    |                    |
| 177                                      | “26”-1b, 1         | 0.38757            | 274.74             |
| 180                                      | 2                  | 0.38675            | 274.36             |
| 183                                      | 3                  | 0.38675            | 274.32             |
| 186                                      | 4                  | 0.38668            | 274.11             |
| 189                                      | 5                  | 0.38665            | 274.27             |

Cite this: DOI: 10.1039/c0xx00000x

www.rsc.org/xxxxxx

### S3 Evaluation Equations

The analytical solution to the underlying system of calibration equations allowed to set up an uncertainty budget using GUM Workbench, and to directly obtain uncertainty results for the evaluations of the experiments. The system of calibration equations as well as its analytical solution(s) can be obtained in the following way. Tables S4 and S5 compile all necessary symbols.

Table S4: Symbols of quantities needed to derive the evaluation equations

| Symbol         | Unit            | Quantity                                                                                                               |
|----------------|-----------------|------------------------------------------------------------------------------------------------------------------------|
| $R_{j,i}$      | mol/mol         | isotope amount ratio, $i^{\text{th}}$ isotope divided by 1 <sup>st</sup> isotope ( $^{24}\text{Mg}$ ), in material $j$ |
| $R^{\text{m}}$ | V/V             | measured signal intensity ratio                                                                                        |
| $I$            | V               | signal intensity (voltage)                                                                                             |
| $n$            | mol             | amount of substance                                                                                                    |
| $m$            | g               | mass                                                                                                                   |
| $M$            | g/mol           | molar mass                                                                                                             |
| $x$            | mol/mol         | amount-of-substance fraction                                                                                           |
| $K$            | (mol/mol)/(V/V) | calibration factor                                                                                                     |

10

Table S5: Subscripts used throughout the derivation of the evaluation equations

| Subscript | Meaning                                               |
|-----------|-------------------------------------------------------|
| 1         | isotope $^{24}\text{Mg}$                              |
| 2         | isotope $^{25}\text{Mg}$                              |
| 3         | isotope $^{26}\text{Mg}$                              |
| A         | Mg material enriched with respect to $^{24}\text{Mg}$ |
| B         | Mg material enriched with respect to $^{25}\text{Mg}$ |
| C         | Mg material enriched with respect to $^{26}\text{Mg}$ |
| AB        | mixture prepared from materials A and B               |
| BC        | mixture prepared from materials B and C               |
| AC        | mixture prepared from materials A and C               |

15 The mixing scheme (Fig. S1) shows that up to 12 signal intensity ratios  $R^{\text{m}}$  in total could be measured, which represent the two independent isotope amount ratios  $R_{j,2} = n(^{25}\text{Mg})/n(^{24}\text{Mg})$  and  $R_{j,3} = n(^{26}\text{Mg})/n(^{24}\text{Mg})$  in the three parent materials and in the three mixtures. To be able to determine the 2 calibration factors (mass discrimination correction factors)  $K$  from the measurement(s), only 2 out of the 3 mixtures and a set of merely 8 signal intensity ratios  $R^{\text{m}}$  and 4 masses  $m$  are required. But even when focusing on 2 mixtures, 4 mathematically equivalent solutions can be obtained, because apart from the 6  
20 signal intensity ratios in the parent materials A, B, and C only 1 intensity ratio in each of the 2 mixtures is necessary. Fig. S2 shows how this leads to 4 possible combinations and in turn to 4 mathematically equivalent solutions.

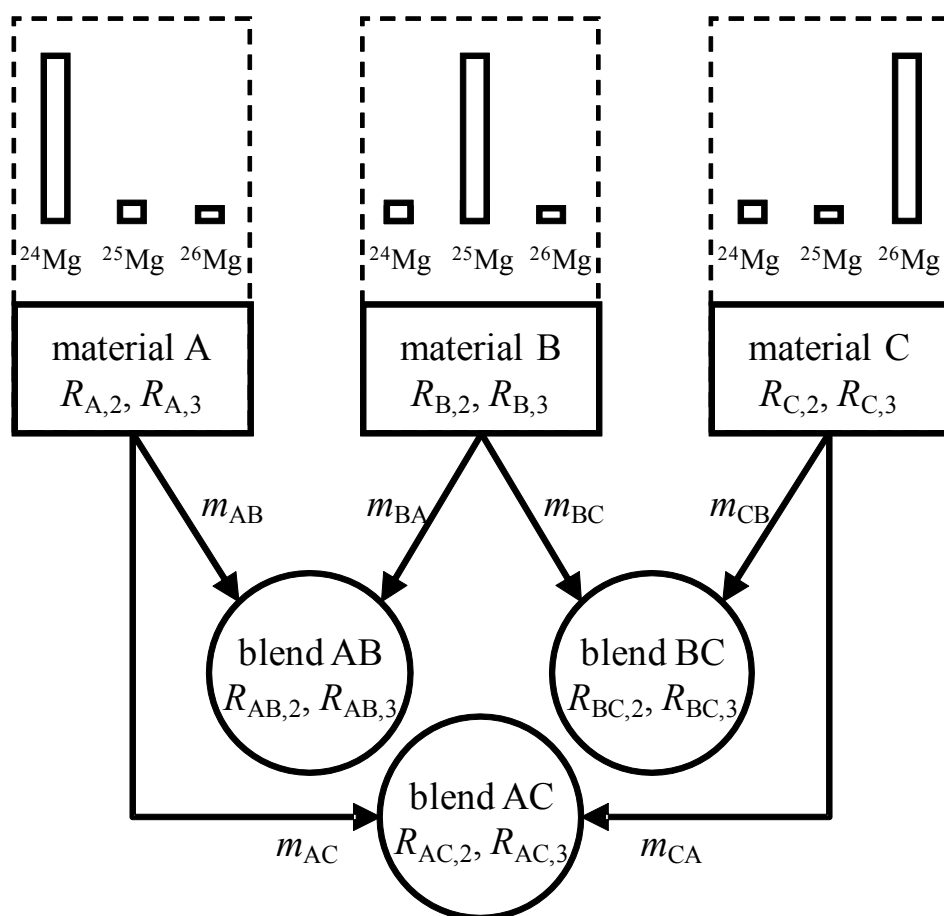

**Fig. S1:** Preparation of the three isotope mixtures AB (“ $^{24}\text{Mg}$ ” plus “ $^{25}\text{Mg}$ ”), BC (“ $^{25}\text{Mg}$ ” plus “ $^{26}\text{Mg}$ ”), and AC (“ $^{24}\text{Mg}$ ” plus “ $^{26}\text{Mg}$ ”) from the isotopically enriched so-called parent materials A (“ $^{24}\text{Mg}$ ”), B (“ $^{25}\text{Mg}$ ”), and C (“ $^{26}\text{Mg}$ ”). Suitable masses like e.g.  $m_{AB}$ , mass of solid material A mixed with material B to yield mixture AB, or  $m_{BA}$ , mass of solid material B mixed with material A to yield mixture AB, were blended via masses of their respective solutions.

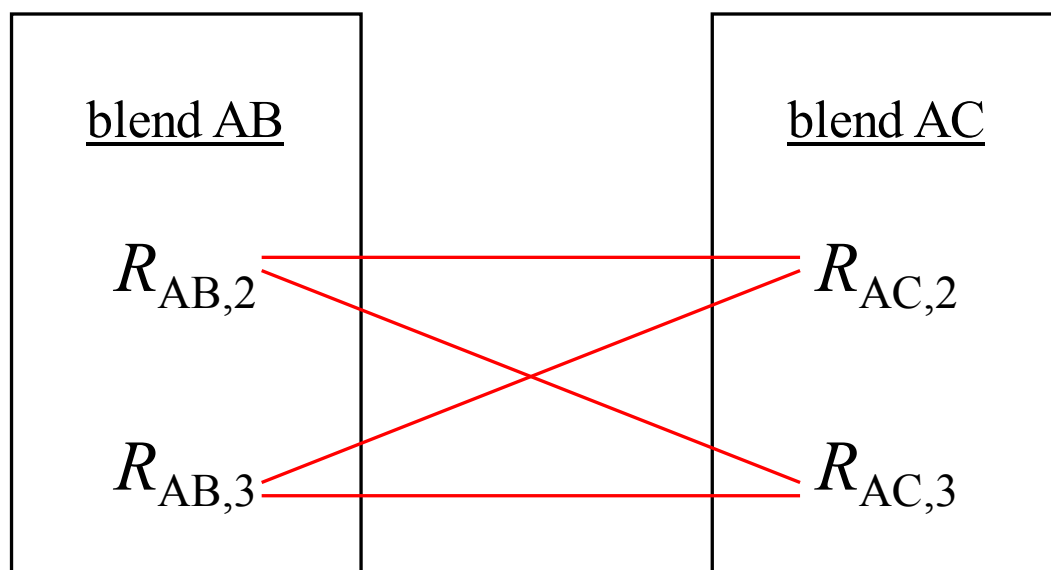

**Fig. S2:** Selecting 1 signal intensity ratio from each of the 2 mixtures AB and AC, leads to 4 possible (and entirely equivalent) combinations required to obtain a mathematical solution for the calibration factors.

Since 3 pairs of mixtures can be selected (AB + AC, AB + BC, and BC + AC), each enabling 4 mathematical solutions, all in all 12 mathematically entirely equivalent solutions to determine/calculate the calibration factors are available. These solutions along with their assigned index (to distinguish between them) are listed in Table S6.

5

Table S6: Possible combination of pairs of mixtures and selection of signal intensity ratios within these mixtures yields 12 equivalent mathematical solutions to determine/calculate the calibration factors. Numbers in the first column have the following meaning: 2 =  $I(^{25}\text{Mg})/I(^{24}\text{Mg})$  and 3 =  $I(^{26}\text{Mg})/I(^{24}\text{Mg})$ . Numbers assigned to a specific combination will be used in the following as indices to distinguish between these solutions.

10

|       | AB + AC | AB + BC | BC + AC |
|-------|---------|---------|---------|
| 2 + 2 | 01      | 05      | 09      |
| 2 + 3 | 02      | 06      | 10      |
| 3 + 2 | 03      | 07      | 11      |
| 3 + 3 | 04      | 08      | 12      |

The isotope amount ratio  $R_{AB,2}$  in mixture AB is connected to the respective measured signal intensity ratio via the calibration factor  $K_2$ . It simply is the amount-of-substance ratio of the isotopes 2 ( $^{25}\text{Mg}$ ) and 1 ( $^{24}\text{Mg}$ ). This in turn can be expressed as the respective sums of amounts of the isotopes from the parent materials A and B. The amount of substance  $n_{A,2}$  of  $^{25}\text{Mg}$  from parent material A is the product of the respective amount-of-substance fraction  $x_{A,2}$  and the total amount of substance  $n_A$  brought into the mixture AB from material A (Eqn. S1).

15

$$R_{AB,2} = K_2 \cdot R_{AB,2}^m = \frac{n_{AB,2}}{n_{AB,1}} = \frac{n_{A,2} + n_{B,2}}{n_{A,1} + n_{B,1}} = \frac{x_{A,2} \cdot n_A + x_{B,2} \cdot n_B}{x_{A,1} \cdot n_A + x_{B,1} \cdot n_B} \quad (\text{S1})$$

The amount-of-substance fractions can be replaced with the respective amount ratios (Eqn. S2).

$$K_2 \cdot R_{AB,2}^m = \frac{x_{A,2} \cdot n_A + x_{B,2} \cdot n_B}{x_{A,1} \cdot n_A + x_{B,1} \cdot n_B} = \frac{\frac{R_{A,2}}{1 + R_{A,2} + R_{A,3}} \cdot n_A + \frac{R_{B,2}}{1 + R_{B,2} + R_{B,3}} \cdot n_B}{\frac{1}{1 + R_{A,2} + R_{A,3}} \cdot n_A + \frac{1}{1 + R_{B,2} + R_{B,3}} \cdot n_B} \quad (\text{S2})$$

On the right-hand side of Eqn. S2, since they are unknown, the amount ratios should be expressed as measured signal intensity ratios (Eqn. S3). Calibration factor  $K_3$  is introduced into the equation the same way.

20

$$K_2 \cdot R_{AB,2}^m = \frac{\frac{K_2 \cdot R_{A,2}^m}{1 + K_2 \cdot R_{A,2}^m + K_3 \cdot R_{A,3}^m} \cdot n_A + \frac{K_2 \cdot R_{B,2}^m}{1 + K_2 \cdot R_{B,2}^m + K_3 \cdot R_{B,3}^m} \cdot n_B}{\frac{1}{1 + K_2 \cdot R_{A,2}^m + K_3 \cdot R_{A,3}^m} \cdot n_A + \frac{1}{1 + K_2 \cdot R_{B,2}^m + K_3 \cdot R_{B,3}^m} \cdot n_B} \quad (\text{S3})$$

Dividing eqn. S3 by  $K_2$  yields eqn. S4:

$$R_{AB,2}^m = \frac{\frac{R_{A,2}^m}{1 + K_2 \cdot R_{A,2}^m + K_3 \cdot R_{A,3}^m} \cdot n_A + \frac{R_{B,2}^m}{1 + K_2 \cdot R_{B,2}^m + K_3 \cdot R_{B,3}^m} \cdot n_B}{\frac{1}{1 + K_2 \cdot R_{A,2}^m + K_3 \cdot R_{A,3}^m} \cdot n_A + \frac{1}{1 + K_2 \cdot R_{B,2}^m + K_3 \cdot R_{B,3}^m} \cdot n_B} \quad (\text{S4})$$

In the next step the amounts  $n_A$  and  $n_B$  should be replaced yielding expressions based on the signal intensity ratios and masses (Eqns. S5 and S6).

25

$$n_A = \frac{m_A}{M_A} = \frac{m_A}{x_{A,1} \cdot M_1 + x_{A,2} \cdot M_2 + x_{A,3} \cdot M_3}$$

$$n_A = \frac{m_A}{\frac{1}{1 + K_2 \cdot R_{A,2}^m + K_3 \cdot R_{A,3}^m} \cdot M_1 + \frac{K_2 \cdot R_{A,2}^m}{1 + K_2 \cdot R_{A,2}^m + K_3 \cdot R_{A,3}^m} \cdot M_2 + \frac{K_3 \cdot R_{A,3}^m}{1 + K_2 \cdot R_{A,2}^m + K_3 \cdot R_{A,3}^m} \cdot M_3}$$

$$n_A = \frac{m_A}{\frac{1}{1 + K_2 \cdot R_{A,2}^m + K_3 \cdot R_{A,3}^m} \cdot (M_1 + K_2 \cdot R_{A,2}^m \cdot M_2 + K_3 \cdot R_{A,3}^m \cdot M_3)}$$

$$n_A = \frac{m_A \cdot (1 + K_2 \cdot R_{A,2}^m + K_3 \cdot R_{A,3}^m)}{M_1 + K_2 \cdot R_{A,2}^m \cdot M_2 + K_3 \cdot R_{A,3}^m \cdot M_3} \quad (S5)$$

$$n_B = \frac{m_B \cdot (1 + K_2 \cdot R_{B,2}^m + K_3 \cdot R_{B,3}^m)}{M_1 + K_2 \cdot R_{B,2}^m \cdot M_2 + K_3 \cdot R_{B,3}^m \cdot M_3} \quad (S6)$$

Replacing  $n_A$  and  $n_B$  in Eqn. S4 with these expression yields Eqn. S7.

$$5 \quad R_{AB,2}^m = \frac{\frac{m_A \cdot R_{A,2}^m}{M_1 + K_2 \cdot R_{A,2}^m \cdot M_2 + K_3 \cdot R_{A,3}^m \cdot M_3} + \frac{m_B \cdot R_{B,2}^m}{M_1 + K_2 \cdot R_{B,2}^m \cdot M_2 + K_3 \cdot R_{B,3}^m \cdot M_3}}{\frac{m_A}{M_1 + K_2 \cdot R_{A,2}^m \cdot M_2 + K_3 \cdot R_{A,3}^m \cdot M_3} + \frac{m_B}{M_1 + K_2 \cdot R_{B,2}^m \cdot M_2 + K_3 \cdot R_{B,3}^m \cdot M_3}} \quad (S7)$$

A completely analogue expression can be derived in the case of the amount-of-substance ratio of the isotopes 3 ( $^{26}\text{Mg}$ ) and 1 ( $^{24}\text{Mg}$ ) to be found in mixture AC.

$$R_{AC,3}^m = \frac{\frac{m_A \cdot R_{A,3}^m}{M_1 + K_2 \cdot R_{A,2}^m \cdot M_2 + K_3 \cdot R_{A,3}^m \cdot M_3} + \frac{m_C \cdot R_{C,3}^m}{M_1 + K_2 \cdot R_{C,2}^m \cdot M_2 + K_3 \cdot R_{C,3}^m \cdot M_3}}{\frac{m_A}{M_1 + K_2 \cdot R_{A,2}^m \cdot M_2 + K_3 \cdot R_{A,3}^m \cdot M_3} + \frac{m_C}{M_1 + K_2 \cdot R_{C,2}^m \cdot M_2 + K_3 \cdot R_{C,3}^m \cdot M_3}} \quad (S8)$$

10 Apart from measured signal intensity ratios and masses as well as published molar masses of all Mg isotopes, Eqns. S7 and S8 contain merely the two unknown calibration factors  $K_2$  and  $K_3$ . Therefore, after several rearrangement steps [1] the equations expressing the calibration factors can be written down explicitly.

$$K_2 = \frac{M_1 \cdot N_2}{M_2 \cdot D}$$

$$K_3 = -\frac{M_1 \cdot N_3}{M_3 \cdot D}$$

15 While both factors share  $D$ ,  $N_i$  is different.  $D$  and  $N_i$  are different for each of the 12 combinations listed in Table S5 [2]. All these combinations are mathematically entirely equivalent and yield exactly the same result. In practice, when used with experimental data and its associated uncertainties, they each can yield significantly different results with quite different associated uncertainties. Since all results agree within the limits of their uncertainties, the uncertainties associated with a particular set of  $K$  factors are therefore already the criterions to decide which is the most suitable set. In the case of the Mg measurements described here, combination 02 yielded the smallest uncertainties of all sets, which is in perfect agreement with the theoretical prediction, that measuring in the mixture AB of “ $^{25}\text{Mg}$ ” and “ $^{24}\text{Mg}$ ” the signal intensity ratio “2” =  $I(^{25}\text{Mg})/I(^{24}\text{Mg})$  and in mixture AC of “ $^{26}\text{Mg}$ ” and “ $^{24}\text{Mg}$ ” the signal intensity ratio “3” =  $I(^{26}\text{Mg})/I(^{24}\text{Mg})$  would be preferable, since the mixtures were prepared in a way that these ratios were adjusted close to unity.

Combination 01:

$$\begin{aligned}
 & \underline{R_{AB,2}^m, R_{AC,2}^m} \\
 D &= m_{AB}m_{AC} \cdot (R_{A,2}^m - R_{AB,2}^m) (R_{AC,2}^m - R_{A,2}^m) (R_{B,2}^m R_{C,3}^m - R_{B,3}^m R_{C,2}^m) \\
 &+ m_{AB}m_{CA} \cdot (R_{A,2}^m - R_{AB,2}^m) (R_{AC,2}^m - R_{C,2}^m) (R_{A,3}^m R_{B,2}^m - R_{A,2}^m R_{B,3}^m) \\
 &+ m_{AC}m_{BA} \cdot (R_{B,2}^m - R_{AB,2}^m) (R_{AC,2}^m - R_{A,2}^m) (R_{A,2}^m R_{C,3}^m - R_{A,3}^m R_{C,2}^m) \\
 & \underline{K_2} \\
 N_2 &= m_{AB}m_{AC} \cdot (R_{C,3}^m - R_{B,3}^m) (R_{AB,2}^m - R_{A,2}^m) (R_{AC,2}^m - R_{A,2}^m) \\
 &+ m_{AB}m_{CA} \cdot (R_{A,3}^m - R_{B,3}^m) (R_{AB,2}^m - R_{A,2}^m) (R_{AC,2}^m - R_{C,2}^m) \\
 &+ m_{AC}m_{BA} \cdot (R_{C,3}^m - R_{A,3}^m) (R_{AB,2}^m - R_{B,2}^m) (R_{AC,2}^m - R_{A,2}^m) \\
 & \underline{K_3} \\
 N_3 &= m_{AB}m_{AC} \cdot (R_{C,2}^m - R_{B,2}^m) (R_{AB,2}^m - R_{A,2}^m) (R_{AC,2}^m - R_{A,2}^m) \\
 &+ m_{AB}m_{CA} \cdot (R_{A,2}^m - R_{B,2}^m) (R_{AB,2}^m - R_{A,2}^m) (R_{AC,2}^m - R_{C,2}^m) \\
 &+ m_{AC}m_{BA} \cdot (R_{C,2}^m - R_{A,2}^m) (R_{AB,2}^m - R_{B,2}^m) (R_{AC,2}^m - R_{A,2}^m)
 \end{aligned}$$

5 Combination 02:

$$\begin{aligned}
 & \underline{R_{AB,2}^m, R_{AC,3}^m} \\
 D &= m_{AB}m_{AC} \cdot (R_{A,2}^m - R_{AB,2}^m) (R_{AC,3}^m - R_{A,3}^m) (R_{B,2}^m R_{C,3}^m - R_{B,3}^m R_{C,2}^m) \\
 &+ m_{AB}m_{CA} \cdot (R_{A,2}^m - R_{AB,2}^m) (R_{AC,3}^m - R_{C,3}^m) (R_{A,3}^m R_{B,2}^m - R_{A,2}^m R_{B,3}^m) \\
 &+ m_{AC}m_{BA} \cdot (R_{B,2}^m - R_{AB,2}^m) (R_{AC,3}^m - R_{A,3}^m) (R_{A,2}^m R_{C,3}^m - R_{A,3}^m R_{C,2}^m) \\
 & \underline{K_2} \\
 N_2 &= m_{AB}m_{AC} \cdot (R_{C,3}^m - R_{B,3}^m) (R_{AB,2}^m - R_{A,2}^m) (R_{AC,3}^m - R_{A,3}^m) \\
 &+ m_{AB}m_{CA} \cdot (R_{A,3}^m - R_{B,3}^m) (R_{AB,2}^m - R_{A,2}^m) (R_{AC,3}^m - R_{C,3}^m) \\
 &+ m_{AC}m_{BA} \cdot (R_{C,3}^m - R_{A,3}^m) (R_{AB,2}^m - R_{B,2}^m) (R_{AC,3}^m - R_{A,3}^m) \\
 & \underline{K_3} \\
 N_3 &= m_{AB}m_{AC} \cdot (R_{C,2}^m - R_{B,2}^m) (R_{AB,2}^m - R_{A,2}^m) (R_{AC,3}^m - R_{A,3}^m) \\
 &+ m_{AB}m_{CA} \cdot (R_{A,2}^m - R_{B,2}^m) (R_{AB,2}^m - R_{A,2}^m) (R_{AC,3}^m - R_{C,3}^m) \\
 &+ m_{AC}m_{BA} \cdot (R_{C,2}^m - R_{A,2}^m) (R_{AB,2}^m - R_{B,2}^m) (R_{AC,3}^m - R_{A,3}^m)
 \end{aligned}$$



Combination 03:

$$\begin{aligned}
 & \underline{R_{AB,3}^m, R_{AC,2}^m} \\
 D &= m_{AB}m_{AC} \cdot (R_{A,3}^m - R_{AB,3}^m) (R_{AC,2}^m - R_{A,2}^m) (R_{B,2}^m R_{C,3}^m - R_{B,3}^m R_{C,2}^m) \\
 &+ m_{AB}m_{CA} \cdot (R_{A,3}^m - R_{AB,3}^m) (R_{AC,2}^m - R_{C,2}^m) (R_{A,3}^m R_{B,2}^m - R_{A,2}^m R_{B,3}^m) \\
 &+ m_{AC}m_{BA} \cdot (R_{B,3}^m - R_{AB,3}^m) (R_{AC,2}^m - R_{A,2}^m) (R_{A,2}^m R_{C,3}^m - R_{A,3}^m R_{C,2}^m) \\
 & \underline{K_2} \\
 N_2 &= m_{AB}m_{AC} \cdot (R_{C,3}^m - R_{B,3}^m) (R_{AB,3}^m - R_{A,3}^m) (R_{AC,2}^m - R_{A,2}^m) \\
 &+ m_{AB}m_{CA} \cdot (R_{A,3}^m - R_{B,3}^m) (R_{AB,3}^m - R_{A,3}^m) (R_{AC,2}^m - R_{C,2}^m) \\
 &+ m_{AC}m_{BA} \cdot (R_{C,3}^m - R_{A,3}^m) (R_{AB,3}^m - R_{B,3}^m) (R_{AC,2}^m - R_{A,2}^m) \\
 & \underline{K_3} \\
 N_3 &= m_{AB}m_{AC} \cdot (R_{C,2}^m - R_{B,2}^m) (R_{AB,3}^m - R_{A,3}^m) (R_{AC,2}^m - R_{A,2}^m) \\
 &+ m_{AB}m_{CA} \cdot (R_{A,2}^m - R_{B,2}^m) (R_{AB,3}^m - R_{A,3}^m) (R_{AC,2}^m - R_{C,2}^m) \\
 &+ m_{AC}m_{BA} \cdot (R_{C,2}^m - R_{A,2}^m) (R_{AB,3}^m - R_{B,3}^m) (R_{AC,2}^m - R_{A,2}^m)
 \end{aligned}$$

5 Combination 04:

$$\begin{aligned}
 & \underline{R_{AB,3}^m, R_{AC,3}^m} \\
 D &= m_{AB}m_{AC} \cdot (R_{A,3}^m - R_{AB,3}^m) (R_{AC,3}^m - R_{A,3}^m) (R_{B,2}^m R_{C,3}^m - R_{B,3}^m R_{C,2}^m) \\
 &+ m_{AB}m_{CA} \cdot (R_{A,3}^m - R_{AB,3}^m) (R_{AC,3}^m - R_{C,3}^m) (R_{A,3}^m R_{B,2}^m - R_{A,2}^m R_{B,3}^m) \\
 &+ m_{AC}m_{BA} \cdot (R_{B,3}^m - R_{AB,3}^m) (R_{AC,3}^m - R_{A,3}^m) (R_{A,2}^m R_{C,3}^m - R_{A,3}^m R_{C,2}^m) \\
 & \underline{K_2} \\
 N_2 &= m_{AB}m_{AC} \cdot (R_{C,3}^m - R_{B,3}^m) (R_{AB,3}^m - R_{A,3}^m) (R_{AC,3}^m - R_{A,3}^m) \\
 &+ m_{AB}m_{CA} \cdot (R_{A,3}^m - R_{B,3}^m) (R_{AB,3}^m - R_{A,3}^m) (R_{AC,3}^m - R_{C,3}^m) \\
 &+ m_{AC}m_{BA} \cdot (R_{C,3}^m - R_{A,3}^m) (R_{AB,3}^m - R_{B,3}^m) (R_{AC,3}^m - R_{A,3}^m) \\
 & \underline{K_3} \\
 N_3 &= m_{AB}m_{AC} \cdot (R_{C,2}^m - R_{B,2}^m) (R_{AB,3}^m - R_{A,3}^m) (R_{AC,3}^m - R_{A,3}^m) \\
 &+ m_{AB}m_{CA} \cdot (R_{A,2}^m - R_{B,2}^m) (R_{AB,3}^m - R_{A,3}^m) (R_{AC,3}^m - R_{C,3}^m) \\
 &+ m_{AC}m_{BA} \cdot (R_{C,2}^m - R_{A,2}^m) (R_{AB,3}^m - R_{B,3}^m) (R_{AC,3}^m - R_{A,3}^m)
 \end{aligned}$$

Combination 05:

$$\begin{aligned}
 & \underline{R_{AB,2}^m, R_{BC,2}^m} \\
 D &= m_{BA} m_{BC} \cdot (R_{B,2}^m - R_{AB,2}^m) (R_{BC,2}^m - R_{B,2}^m) (R_{A,2}^m R_{C,3}^m - R_{A,3}^m R_{C,2}^m) \\
 &+ m_{BA} m_{CB} \cdot (R_{B,2}^m - R_{AB,2}^m) (R_{BC,2}^m - R_{C,2}^m) (R_{B,3}^m R_{A,2}^m - R_{B,2}^m R_{A,3}^m) \\
 &+ m_{BC} m_{AB} \cdot (R_{A,2}^m - R_{AB,2}^m) (R_{BC,2}^m - R_{B,2}^m) (R_{B,2}^m R_{C,3}^m - R_{B,3}^m R_{C,2}^m) \\
 & \underline{K_2} \\
 N_2 &= m_{BA} m_{BC} \cdot (R_{C,3}^m - R_{A,3}^m) (R_{AB,2}^m - R_{B,2}^m) (R_{BC,2}^m - R_{B,2}^m) \\
 &+ m_{BA} m_{CB} \cdot (R_{B,3}^m - R_{A,3}^m) (R_{AB,2}^m - R_{B,2}^m) (R_{BC,2}^m - R_{C,2}^m) \\
 &+ m_{BC} m_{AB} \cdot (R_{C,3}^m - R_{B,3}^m) (R_{AB,2}^m - R_{A,2}^m) (R_{BC,2}^m - R_{B,2}^m) \\
 & \underline{K_3} \\
 N_3 &= m_{BA} m_{BC} \cdot (R_{C,2}^m - R_{A,2}^m) (R_{AB,2}^m - R_{B,2}^m) (R_{BC,2}^m - R_{B,2}^m) \\
 &+ m_{BA} m_{CB} \cdot (R_{B,2}^m - R_{A,2}^m) (R_{AB,2}^m - R_{B,2}^m) (R_{BC,2}^m - R_{C,2}^m) \\
 &+ m_{BC} m_{AB} \cdot (R_{C,2}^m - R_{B,2}^m) (R_{AB,2}^m - R_{A,2}^m) (R_{BC,2}^m - R_{B,2}^m)
 \end{aligned}$$

Combination 06:

$$\begin{aligned}
 & \underline{R_{AB,2}^m, R_{BC,3}^m} \\
 D &= m_{BA} m_{BC} \cdot (R_{B,2}^m - R_{AB,2}^m) (R_{BC,3}^m - R_{B,3}^m) (R_{A,2}^m R_{C,3}^m - R_{A,3}^m R_{C,2}^m) \\
 &+ m_{BA} m_{CB} \cdot (R_{B,2}^m - R_{AB,2}^m) (R_{BC,3}^m - R_{C,3}^m) (R_{B,3}^m R_{A,2}^m - R_{B,2}^m R_{A,3}^m) \\
 &+ m_{BC} m_{AB} \cdot (R_{A,2}^m - R_{AB,2}^m) (R_{BC,3}^m - R_{B,3}^m) (R_{B,2}^m R_{C,3}^m - R_{B,3}^m R_{C,2}^m) \\
 & \underline{K_2} \\
 5 \quad N_2 &= m_{BA} m_{BC} \cdot (R_{C,3}^m - R_{A,3}^m) (R_{AB,2}^m - R_{B,2}^m) (R_{BC,3}^m - R_{B,3}^m) \\
 &+ m_{BA} m_{CB} \cdot (R_{B,3}^m - R_{A,3}^m) (R_{AB,2}^m - R_{B,2}^m) (R_{BC,3}^m - R_{C,3}^m) \\
 &+ m_{BC} m_{AB} \cdot (R_{C,3}^m - R_{B,3}^m) (R_{AB,2}^m - R_{A,2}^m) (R_{BC,3}^m - R_{B,3}^m) \\
 & \underline{K_3} \\
 N_3 &= m_{BA} m_{BC} \cdot (R_{C,2}^m - R_{A,2}^m) (R_{AB,2}^m - R_{B,2}^m) (R_{BC,3}^m - R_{B,3}^m) \\
 &+ m_{BA} m_{CB} \cdot (R_{B,2}^m - R_{A,2}^m) (R_{AB,2}^m - R_{B,2}^m) (R_{BC,3}^m - R_{C,3}^m) \\
 &+ m_{BC} m_{AB} \cdot (R_{C,2}^m - R_{B,2}^m) (R_{AB,2}^m - R_{A,2}^m) (R_{BC,3}^m - R_{B,3}^m)
 \end{aligned}$$

Combination 07:

$$\begin{aligned}
 & \underline{R_{AB,3}^m, R_{BC,2}^m} \\
 D &= m_{BA} m_{BC} \cdot (R_{B,3}^m - R_{AB,3}^m) (R_{BC,2}^m - R_{B,2}^m) (R_{A,2}^m R_{C,3}^m - R_{A,3}^m R_{C,2}^m) \\
 &+ m_{BA} m_{CB} \cdot (R_{B,3}^m - R_{AB,3}^m) (R_{BC,2}^m - R_{C,2}^m) (R_{B,3}^m R_{A,2}^m - R_{B,2}^m R_{A,3}^m) \\
 &+ m_{BC} m_{AB} \cdot (R_{A,3}^m - R_{AB,3}^m) (R_{BC,2}^m - R_{B,2}^m) (R_{B,2}^m R_{C,3}^m - R_{B,3}^m R_{C,2}^m) \\
 & \underline{K_2} \\
 N_2 &= m_{BA} m_{BC} \cdot (R_{C,3}^m - R_{A,3}^m) (R_{AB,3}^m - R_{B,3}^m) (R_{BC,2}^m - R_{B,2}^m) \\
 &+ m_{BA} m_{CB} \cdot (R_{B,3}^m - R_{A,3}^m) (R_{AB,3}^m - R_{B,3}^m) (R_{BC,2}^m - R_{C,2}^m) \\
 &+ m_{BC} m_{AB} \cdot (R_{C,3}^m - R_{B,3}^m) (R_{AB,3}^m - R_{A,3}^m) (R_{BC,2}^m - R_{B,2}^m) \\
 & \underline{K_3} \\
 N_3 &= m_{BA} m_{BC} \cdot (R_{C,2}^m - R_{A,2}^m) (R_{AB,3}^m - R_{B,3}^m) (R_{BC,2}^m - R_{B,2}^m) \\
 &+ m_{BA} m_{CB} \cdot (R_{B,2}^m - R_{A,2}^m) (R_{AB,3}^m - R_{B,3}^m) (R_{BC,2}^m - R_{C,2}^m) \\
 &+ m_{BC} m_{AB} \cdot (R_{C,2}^m - R_{B,2}^m) (R_{AB,3}^m - R_{A,3}^m) (R_{BC,2}^m - R_{B,2}^m)
 \end{aligned}$$

Combination 08:

$$\begin{aligned}
 & \underline{R_{AB,3}^m, R_{BC,3}^m} \\
 D &= m_{BA} m_{BC} \cdot (R_{B,3}^m - R_{AB,3}^m) (R_{BC,3}^m - R_{B,3}^m) (R_{A,2}^m R_{C,3}^m - R_{A,3}^m R_{C,2}^m) \\
 &+ m_{BA} m_{CB} \cdot (R_{B,3}^m - R_{AB,3}^m) (R_{BC,3}^m - R_{C,3}^m) (R_{B,3}^m R_{A,2}^m - R_{B,2}^m R_{A,3}^m) \\
 &+ m_{BC} m_{AB} \cdot (R_{A,3}^m - R_{AB,3}^m) (R_{BC,3}^m - R_{B,3}^m) (R_{B,2}^m R_{C,3}^m - R_{B,3}^m R_{C,2}^m) \\
 & \underline{K_2} \\
 5 N_2 &= m_{BA} m_{BC} \cdot (R_{C,3}^m - R_{A,3}^m) (R_{AB,3}^m - R_{B,3}^m) (R_{BC,3}^m - R_{B,3}^m) \\
 &+ m_{BA} m_{CB} \cdot (R_{B,3}^m - R_{A,3}^m) (R_{AB,3}^m - R_{B,3}^m) (R_{BC,3}^m - R_{C,3}^m) \\
 &+ m_{BC} m_{AB} \cdot (R_{C,3}^m - R_{B,3}^m) (R_{AB,3}^m - R_{A,3}^m) (R_{BC,3}^m - R_{B,3}^m) \\
 & \underline{K_3} \\
 N_3 &= m_{BA} m_{BC} \cdot (R_{C,2}^m - R_{A,2}^m) (R_{AB,3}^m - R_{B,3}^m) (R_{BC,3}^m - R_{B,3}^m) \\
 &+ m_{BA} m_{CB} \cdot (R_{B,2}^m - R_{A,2}^m) (R_{AB,3}^m - R_{B,3}^m) (R_{BC,3}^m - R_{C,3}^m) \\
 &+ m_{BC} m_{AB} \cdot (R_{C,2}^m - R_{B,2}^m) (R_{AB,3}^m - R_{A,3}^m) (R_{BC,3}^m - R_{B,3}^m)
 \end{aligned}$$

Combination 09:

$$\begin{aligned}
 & \underline{R_{BC,2}^m, R_{AC,2}^m} \\
 D &= m_{CB}m_{CA} \cdot (R_{C,2}^m - R_{BC,2}^m) (R_{AC,2}^m - R_{C,2}^m) (R_{B,2}^m R_{A,3}^m - R_{B,3}^m R_{A,2}^m) \\
 &+ m_{CB}m_{AC} \cdot (R_{C,2}^m - R_{BC,2}^m) (R_{AC,2}^m - R_{A,2}^m) (R_{C,3}^m R_{B,2}^m - R_{C,2}^m R_{B,3}^m) \\
 &+ m_{CA}m_{BC} \cdot (R_{B,2}^m - R_{BC,2}^m) (R_{AC,2}^m - R_{C,2}^m) (R_{C,2}^m R_{A,3}^m - R_{C,3}^m R_{A,2}^m) \\
 & \underline{K_2} \\
 N_2 &= m_{CB}m_{CA} \cdot (R_{A,3}^m - R_{B,3}^m) (R_{BC,2}^m - R_{C,2}^m) (R_{AC,2}^m - R_{C,2}^m) \\
 &+ m_{CB}m_{AC} \cdot (R_{C,3}^m - R_{B,3}^m) (R_{BC,2}^m - R_{C,2}^m) (R_{AC,2}^m - R_{A,2}^m) \\
 &+ m_{CA}m_{BC} \cdot (R_{A,3}^m - R_{C,3}^m) (R_{BC,2}^m - R_{B,2}^m) (R_{AC,2}^m - R_{C,2}^m) \\
 & \underline{K_3} \\
 N_3 &= m_{CB}m_{CA} \cdot (R_{A,2}^m - R_{B,2}^m) (R_{BC,2}^m - R_{C,2}^m) (R_{AC,2}^m - R_{C,2}^m) \\
 &+ m_{CB}m_{AC} \cdot (R_{C,2}^m - R_{B,2}^m) (R_{BC,2}^m - R_{C,2}^m) (R_{AC,2}^m - R_{A,2}^m) \\
 &+ m_{CA}m_{BC} \cdot (R_{A,2}^m - R_{C,2}^m) (R_{BC,2}^m - R_{B,2}^m) (R_{AC,2}^m - R_{C,2}^m)
 \end{aligned}$$

Combination 10:

$$\begin{aligned}
 & \underline{R_{BC,2}^m, R_{AC,3}^m} \\
 D &= m_{CB}m_{CA} \cdot (R_{C,2}^m - R_{BC,2}^m) (R_{AC,3}^m - R_{C,3}^m) (R_{B,2}^m R_{A,3}^m - R_{B,3}^m R_{A,2}^m) \\
 &+ m_{CB}m_{AC} \cdot (R_{C,2}^m - R_{BC,2}^m) (R_{AC,3}^m - R_{A,3}^m) (R_{C,3}^m R_{B,2}^m - R_{C,2}^m R_{B,3}^m) \\
 &+ m_{CA}m_{BC} \cdot (R_{B,2}^m - R_{BC,2}^m) (R_{AC,3}^m - R_{C,3}^m) (R_{C,2}^m R_{A,3}^m - R_{C,3}^m R_{A,2}^m) \\
 & \underline{K_2} \\
 5 \quad N_2 &= m_{CB}m_{CA} \cdot (R_{A,3}^m - R_{B,3}^m) (R_{BC,2}^m - R_{C,2}^m) (R_{AC,3}^m - R_{C,3}^m) \\
 &+ m_{CB}m_{AC} \cdot (R_{C,3}^m - R_{B,3}^m) (R_{BC,2}^m - R_{C,2}^m) (R_{AC,3}^m - R_{A,3}^m) \\
 &+ m_{CA}m_{BC} \cdot (R_{A,3}^m - R_{C,3}^m) (R_{BC,2}^m - R_{B,2}^m) (R_{AC,3}^m - R_{C,3}^m) \\
 & \underline{K_3} \\
 N_3 &= m_{CB}m_{CA} \cdot (R_{A,2}^m - R_{B,2}^m) (R_{BC,2}^m - R_{C,2}^m) (R_{AC,3}^m - R_{C,3}^m) \\
 &+ m_{CB}m_{AC} \cdot (R_{C,2}^m - R_{B,2}^m) (R_{BC,2}^m - R_{C,2}^m) (R_{AC,3}^m - R_{A,3}^m) \\
 &+ m_{CA}m_{BC} \cdot (R_{A,2}^m - R_{C,2}^m) (R_{BC,2}^m - R_{B,2}^m) (R_{AC,3}^m - R_{C,3}^m)
 \end{aligned}$$

Combination 11:

$$\begin{aligned}
 & \underline{R_{BC,3}^m, R_{AC,2}^m} \\
 D &= m_{CB}m_{CA} \cdot (R_{C,3}^m - R_{BC,3}^m) (R_{AC,2}^m - R_{C,2}^m) (R_{B,2}^m R_{A,3}^m - R_{B,3}^m R_{A,2}^m) \\
 &+ m_{CB}m_{AC} \cdot (R_{C,3}^m - R_{BC,3}^m) (R_{AC,2}^m - R_{A,2}^m) (R_{C,3}^m R_{B,2}^m - R_{C,2}^m R_{B,3}^m) \\
 &+ m_{CA}m_{BC} \cdot (R_{B,3}^m - R_{BC,3}^m) (R_{AC,2}^m - R_{C,2}^m) (R_{C,2}^m R_{A,3}^m - R_{C,3}^m R_{A,2}^m) \\
 & \underline{K_2} \\
 N_2 &= m_{CB}m_{CA} \cdot (R_{A,3}^m - R_{B,3}^m) (R_{BC,3}^m - R_{C,3}^m) (R_{AC,2}^m - R_{C,2}^m) \\
 &+ m_{CB}m_{AC} \cdot (R_{C,3}^m - R_{B,3}^m) (R_{BC,3}^m - R_{C,3}^m) (R_{AC,2}^m - R_{A,2}^m) \\
 &+ m_{CA}m_{BC} \cdot (R_{A,3}^m - R_{C,3}^m) (R_{BC,3}^m - R_{B,3}^m) (R_{AC,2}^m - R_{C,2}^m) \\
 & \underline{K_3} \\
 N_3 &= m_{CB}m_{CA} \cdot (R_{A,2}^m - R_{B,2}^m) (R_{BC,3}^m - R_{C,3}^m) (R_{AC,2}^m - R_{C,2}^m) \\
 &+ m_{CB}m_{AC} \cdot (R_{C,2}^m - R_{B,2}^m) (R_{BC,3}^m - R_{C,3}^m) (R_{AC,2}^m - R_{A,2}^m) \\
 &+ m_{CA}m_{BC} \cdot (R_{A,2}^m - R_{C,2}^m) (R_{BC,3}^m - R_{B,3}^m) (R_{AC,2}^m - R_{C,2}^m)
 \end{aligned}$$

Combination 12:

$$\begin{aligned}
 & \underline{R_{BC,3}^m, R_{AC,3}^m} \\
 D &= m_{CB}m_{CA} \cdot (R_{C,3}^m - R_{BC,3}^m) (R_{AC,3}^m - R_{C,3}^m) (R_{B,2}^m R_{A,3}^m - R_{B,3}^m R_{A,2}^m) \\
 &+ m_{CB}m_{AC} \cdot (R_{C,3}^m - R_{BC,3}^m) (R_{AC,3}^m - R_{A,3}^m) (R_{C,3}^m R_{B,2}^m - R_{C,2}^m R_{B,3}^m) \\
 &+ m_{CA}m_{BC} \cdot (R_{B,3}^m - R_{BC,3}^m) (R_{AC,3}^m - R_{C,3}^m) (R_{C,2}^m R_{A,3}^m - R_{C,3}^m R_{A,2}^m) \\
 & \underline{K_2} \\
 5 N_2 &= m_{CB}m_{CA} \cdot (R_{A,3}^m - R_{B,3}^m) (R_{BC,3}^m - R_{C,3}^m) (R_{AC,3}^m - R_{C,3}^m) \\
 &+ m_{CB}m_{AC} \cdot (R_{C,3}^m - R_{B,3}^m) (R_{BC,3}^m - R_{C,3}^m) (R_{AC,3}^m - R_{A,3}^m) \\
 &+ m_{CA}m_{BC} \cdot (R_{A,3}^m - R_{C,3}^m) (R_{BC,3}^m - R_{B,3}^m) (R_{AC,3}^m - R_{C,3}^m) \\
 & \underline{K_3} \\
 N_3 &= m_{CB}m_{CA} \cdot (R_{A,2}^m - R_{B,2}^m) (R_{BC,3}^m - R_{C,3}^m) (R_{AC,3}^m - R_{C,3}^m) \\
 &+ m_{CB}m_{AC} \cdot (R_{C,2}^m - R_{B,2}^m) (R_{BC,3}^m - R_{C,3}^m) (R_{AC,3}^m - R_{A,3}^m) \\
 &+ m_{CA}m_{BC} \cdot (R_{A,2}^m - R_{C,2}^m) (R_{BC,3}^m - R_{B,3}^m) (R_{AC,3}^m - R_{C,3}^m)
 \end{aligned}$$

Cite this: DOI: 10.1039/c0xx00000x

PAPER

www.rsc.org/xxxxxx

#### S4 Results of All Sequences

The data compiled in tables S6 to S8 show all results for the isotopic composition of the three IRM candidates measured with the calibrated mass spectrometers with associated expanded uncertainties (for  $k = 2$ ) based on the uncertainty budgets; there is one table per laboratory (S6 shows data from LGC, S7 shows PTB data, and S8 data from BAM). Those data are also represented in graphical form in Fig. 7 in the main part of this publication. There are three sets of calibration mixtures, denoted 1b, 2b, and 3b (b denotes the fact that this is the second setup of calibration solutions; data from the first setup are only shown in one part of this paper, see Fig. 6 in the main part and the discussion). Only one set of calibration solutions was used per sequence. PTB measured three sequences per set of calibration mixture, which resulted in nine measured sequences in each of those labs; BAM measured one additional sequence, resulting in 10 measured sequences; LGC has measured one sequence per set of calibration mixtures, which resulted in three total sequences measured.

**Table S7** All values (3 sequences) for absolute isotopic composition of the three IRM candidates measured at LGC, with expanded uncertainties ( $k = 2$ ).

| Parameter                                                | Candidate     |               |               |
|----------------------------------------------------------|---------------|---------------|---------------|
|                                                          | ERM-AE143     | ERM-AE144     | ERM-AE145     |
| <b>Isotope amount fractions</b>                          |               |               |               |
| $x(^{24}\text{Mg}) / (\text{mol/mol})$                   |               |               |               |
| Solutions -1b                                            | 0.789931(18)  | 0.790132(19)  | 0.790065(19)  |
| Solutions -2b                                            | 0.789972(19)  | 0.790167(19)  | 0.790079(24)  |
| Solutions -3b                                            | 0.789967(20)  | 0.790165(26)  | 0.790066(27)  |
| Average                                                  | 0.789957(19)  | 0.790155(22)  | 0.790070(24)  |
| $s(x(^{24}\text{Mg})) / (\text{mol/mol})$                | 0.000022      | 0.000020      | 0.0000078     |
| $x(^{25}\text{Mg}) / (\text{mol/mol})$                   |               |               |               |
| Solutions -1b                                            | 0.099989(11)  | 0.099933(13)  | 0.099955(12)  |
| Solutions -2b                                            | 0.099982(13)  | 0.099927(11)  | 0.099957(15)  |
| Solutions -3b                                            | 0.099982(12)  | 0.099926(17)  | 0.099959(17)  |
| Average                                                  | 0.099984(12)  | 0.099929(14)  | 0.099957(15)  |
| $s(x(^{25}\text{Mg})) / (\text{mol/mol})$                | 0.0000039     | 0.0000038     | 0.0000021     |
| $x(^{26}\text{Mg}) / (\text{mol/mol})$                   |               |               |               |
| Solutions -1b                                            | 0.110080(16)  | 0.109935(16)  | 0.109980(17)  |
| Solutions -2b                                            | 0.110045(17)  | 0.109906(18)  | 0.109963(22)  |
| Solutions -3b                                            | 0.110052(18)  | 0.109909(23)  | 0.109975(25)  |
| Average                                                  | 0.110059(17)  | 0.109917(19)  | 0.109973(22)  |
| $s(x(^{26}\text{Mg})) / (\text{mol/mol})$                | 0.000018      | 0.000016      | 0.0000084     |
| <b>Isotope amount ratios</b>                             |               |               |               |
| $n(^{25}\text{Mg})/n(^{24}\text{Mg}) / (\text{mol/mol})$ |               |               |               |
| Solutions -1b                                            | 0.126579(16)  | 0.126477(18)  | 0.126514(16)  |
| Solutions -2b                                            | 0.126564(18)  | 0.126464(15)  | 0.126515(21)  |
| Solutions -3b                                            | 0.126565(17)  | 0.126462(24)  | 0.126520(24)  |
| Average                                                  | 0.126569(17)  | 0.126468(19)  | 0.126518(21)  |
| $s(n(^{25}\text{Mg})/n(^{24}\text{Mg}))$                 | 0.0000084     | 0.0000079     | 0.0000028     |
| $n(^{26}\text{Mg})/n(^{24}\text{Mg}) / (\text{mol/mol})$ |               |               |               |
| Solutions -1b                                            | 0.139354(23)  | 0.139135(23)  | 0.139203(24)  |
| Solutions -2b                                            | 0.139303(25)  | 0.139092(25)  | 0.139180(31)  |
| Solutions -3b                                            | 0.139312(26)  | 0.139096(32)  | 0.139197(36)  |
| Average                                                  | 0.139323(25)  | 0.139108(27)  | 0.139193(31)  |
| $s(n(^{26}\text{Mg})/n(^{24}\text{Mg}))$                 | 0.000027      | 0.000024      | 0.000012      |
| <b>Relative atomic weights</b>                           |               |               |               |
| $A_r(\text{Mg})$                                         |               |               |               |
| Solutions -1b                                            | 24.305001(32) | 24.304655(32) | 24.304766(34) |
| Solutions -2b                                            | 24.304925(35) | 24.304591(35) | 24.304736(43) |
| Solutions -3b                                            | 24.304937(37) | 24.304597(45) | 24.304760(49) |
| Average                                                  | 24.304954(35) | 24.304614(38) | 24.304754(42) |
| $s(A_r(\text{Mg}))$                                      | 0.000041      | 0.000035      | 0.000016      |

**Table S8** All values (9 sequences) for absolute isotopic composition of the three IRM candidates measured at PTB, with expanded uncertainties ( $k = 2$ ).

| Parameter                                                | Candidate     |               |               |
|----------------------------------------------------------|---------------|---------------|---------------|
|                                                          | ERM-AE143     | ERM-AE144     | ERM-AE145     |
| <b>Isotope amount fractions</b>                          |               |               |               |
| $x(^{24}\text{Mg}) / (\text{mol/mol})$                   |               |               |               |
| (Solutions -1b) 1                                        | 0.789958(18)  | 0.790166(18)  | 0.790109(19)  |
| 2                                                        | 0.7899021(91) | 0.7901089(91) | 0.7900653(91) |
| 3                                                        | 0.7899100(92) | 0.7901136(91) | 0.7900719(93) |
| (Solutions -2b) 4                                        | 0.789900(10)  | 0.790102(10)  | 0.790066(10)  |
| 5                                                        | 0.789912(13)  | 0.790115(13)  | 0.790077(13)  |
| 6                                                        | 0.789907(10)  | 0.7901128(93) | 0.7900714(92) |
| (Solutions -3b) 7                                        | 0.789912(11)  | 0.790116(10)  | 0.790073(11)  |
| 8                                                        | 0.789941(26)  | 0.790138(41)  | 0.790114(25)  |
| 9                                                        | 0.789967(11)  | 0.790160(10)  | 0.790124(11)  |
| Average                                                  | 0.789923(14)  | 0.790126(17)  | 0.790086(14)  |
| $s(x(^{24}\text{Mg})) / (\text{mol/mol})$                | 0.000025      | 0.000023      | 0.000023      |
| $x(^{25}\text{Mg}) / (\text{mol/mol})$                   |               |               |               |
| (Solutions -1b) 1                                        | 0.099980(12)  | 0.099924(12)  | 0.099941(13)  |
| 2                                                        | 0.1000030(55) | 0.0999462(55) | 0.0999622(56) |
| 3                                                        | 0.0999920(55) | 0.0999358(55) | 0.0999518(56) |
| (Solutions -2b) 4                                        | 0.1000080(67) | 0.0999520(69) | 0.0999660(66) |
| 5                                                        | 0.1000025(63) | 0.0999454(62) | 0.0999610(63) |
| 6                                                        | 0.1000037(55) | 0.0999477(55) | 0.0999624(54) |
| (Solutions -3b) 7                                        | 0.0999903(75) | 0.0999353(74) | 0.0999498(76) |
| 8                                                        | 0.099988(12)  | 0.099933(19)  | 0.099943(11)  |
| 9                                                        | 0.0999752(63) | 0.0999187(62) | 0.0999367(65) |
| Average                                                  | 0.0999936(79) | 0.0999375(93) | 0.0999527(79) |
| $s(x(^{25}\text{Mg})) / (\text{mol/mol})$                | 0.000011      | 0.000011      | 0.000011      |
| $x(^{26}\text{Mg}) / (\text{mol/mol})$                   |               |               |               |
| (Solutions -1b) 1                                        | 0.110062(16)  | 0.109911(16)  | 0.109949(17)  |
| 2                                                        | 0.1100948(66) | 0.1099449(66) | 0.1099725(65) |
| 3                                                        | 0.1100980(66) | 0.1099506(65) | 0.1099762(67) |
| (Solutions -2b) 4                                        | 0.1100917(72) | 0.1099460(72) | 0.1099681(71) |
| 5                                                        | 0.110085(11)  | 0.109939(11)  | 0.109962(11)  |
| 6                                                        | 0.1100891(72) | 0.1099395(69) | 0.1099662(68) |
| (Solutions -3b) 7                                        | 0.1100979(71) | 0.1099490(68) | 0.1099768(72) |
| 8                                                        | 0.110072(20)  | 0.109929(37)  | 0.109943(19)  |
| 9                                                        | 0.1100575(86) | 0.1099209(76) | 0.1099389(77) |
| Average                                                  | 0.110083(11)  | 0.109937(15)  | 0.109961(11)  |
| $s(x(^{26}\text{Mg})) / (\text{mol/mol})$                | 0.000016      | 0.000014      | 0.000014      |
| <b>Isotope amount ratios</b>                             |               |               |               |
| $n(^{25}\text{Mg})/n(^{24}\text{Mg}) / (\text{mol/mol})$ |               |               |               |
| (Solutions -1b) 1                                        | 0.126564(17)  | 0.126459(17)  | 0.126490(18)  |
| 2                                                        | 0.1266018(80) | 0.1264967(80) | 0.1265240(82) |
| 3                                                        | 0.1265865(81) | 0.1264829(81) | 0.1265098(82) |
| (Solutions -2b) 4                                        | 0.126608(10)  | 0.126505(10)  | 0.126529(10)  |
| 5                                                        | 0.1265995(91) | 0.1264947(89) | 0.1265207(92) |
| 6                                                        | 0.1266019(81) | 0.1264980(80) | 0.1265233(79) |
| (Solutions -3b) 7                                        | 0.126584(11)  | 0.126482(11)  | 0.126507(11)  |
| 8                                                        | 0.126576(18)  | 0.126476(28)  | 0.126492(17)  |
| 9                                                        | 0.1265561(92) | 0.1264537(90) | 0.126482(10)  |
| Average                                                  | 0.126586(12)  | 0.126483(14)  | 0.126509(12)  |
| $s(n(^{25}\text{Mg})/n(^{24}\text{Mg}))$                 | 0.000018      | 0.000018      | 0.000017      |
| $n(^{26}\text{Mg})/n(^{24}\text{Mg}) / (\text{mol/mol})$ |               |               |               |
| (Solutions -1b) 1                                        | 0.139326(23)  | 0.139098(23)  | 0.139157(24)  |
| 2                                                        | 0.139378(10)  | 0.139152(10)  | 0.139194(10)  |
| 3                                                        | 0.139380(10)  | 0.139158(10)  | 0.139198(10)  |
| (Solutions -2b) 4                                        | 0.139374(11)  | 0.139154(10)  | 0.139189(10)  |
| 5                                                        | 0.139364(16)  | 0.139143(16)  | 0.139179(16)  |
| 6                                                        | 0.139370(11)  | 0.139144(10)  | 0.139185(10)  |
| (Solutions -3b) 7                                        | 0.139380(10)  | 0.139156(10)  | 0.139198(10)  |
| 8                                                        | 0.139342(30)  | 0.139127(54)  | 0.139148(28)  |
| 9                                                        | 0.139319(13)  | 0.139112(11)  | 0.139141(11)  |
| Average                                                  | 0.139359(16)  | 0.139138(22)  | 0.139177(16)  |
| $s(n(^{26}\text{Mg})/n(^{24}\text{Mg}))$                 | 0.000024      | 0.000021      | 0.000022      |

5

| Relative atomic weights | $A_r(\text{Mg})$ |               |               |
|-------------------------|------------------|---------------|---------------|
| (Solutions -1b) 1       | 24.304955(32)    | 24.304597(32) | 24.304692(34) |
| 2                       | 24.305044(15)    | 24.304688(15) | 24.304759(15) |
| 3                       | 24.305040(15)    | 24.304689(15) | 24.304756(15) |
| (Solutions -2b) 4       | 24.305043(16)    | 24.304696(16) | 24.304754(16) |
| 5                       | 24.305025(23)    | 24.304676(23) | 24.304738(23) |
| 6                       | 24.305034(16)    | 24.304679(15) | 24.304747(15) |
| (Solutions -3b) 7       | 24.305038(16)    | 24.304685(16) | 24.304755(16) |
| 8                       | 24.304983(45)    | 24.304643(76) | 24.304680(44) |
| 9                       | 24.304942(19)    | 24.304612(17) | 24.304666(17) |
| Average                 | 24.305011(24)    | 24.304663(31) | 24.304728(24) |
| $s(A_r(\text{Mg}))$     | 0.000040         | 0.000036      | 0.000037      |

**Table S9** All values (10 sequences) for the absolute isotopic composition of the three IRM candidates measured at BAM, with expanded uncertainties ( $k = 2$ ).

| Parameter                                 | Candidate                                                |               |               |
|-------------------------------------------|----------------------------------------------------------|---------------|---------------|
|                                           | ERM-AE143                                                | ERM-AE144     | ERM-AE145     |
| <b>Isotope amount fractions</b>           |                                                          |               |               |
|                                           | $x(^{24}\text{Mg}) / (\text{mol/mol})$                   |               |               |
| (Solutions -1b) 1                         | 0.789894(18)                                             | 0.790104(18)  | 0.790059(19)  |
| 2                                         | 0.789889(10)                                             | 0.790102(10)  | 0.7900632(98) |
| 3                                         | 0.789880(11)                                             | 0.790087(10)  | 0.790051(10)  |
| (Solutions -2b) 4                         | 0.7899146(95)                                            | 0.7901237(96) | 0.7900834(96) |
| 5                                         | 0.789913(12)                                             | 0.790124(12)  | 0.790081(12)  |
| 6                                         | 0.789910(11)                                             | 0.790118(10)  | 0.7900787(98) |
| 7                                         | 0.789921(10)                                             | 0.790126(10)  | 0.790083(10)  |
| (Solutions -3b) 8                         | 0.789913(12)                                             | 0.790121(12)  | 0.790084(12)  |
| 9                                         | 0.7899079(98)                                            | 0.790115(10)  | 0.7900698(98) |
| 10                                        | 0.7899113(99)                                            | 0.790118(10)  | 0.7900731(97) |
| Average                                   | 0.789905(12)                                             | 0.790114(11)  | 0.790073(12)  |
| $s(x(^{24}\text{Mg})) / (\text{mol/mol})$ | 0.000013                                                 | 0.000013      | 0.000012      |
|                                           | $x(^{25}\text{Mg}) / (\text{mol/mol})$                   |               |               |
| (Solutions -1b) 1                         | 0.099999(13)                                             | 0.099941(13)  | 0.099957(13)  |
| 2                                         | 0.1000021(61)                                            | 0.0999450(58) | 0.0999579(59) |
| 3                                         | 0.1000066(72)                                            | 0.0999500(67) | 0.0999618(69) |
| (Solutions -2b) 4                         | 0.1000035(58)                                            | 0.0999459(57) | 0.0999595(58) |
| 5                                         | 0.1000004(71)                                            | 0.0999425(70) | 0.0999570(70) |
| 6                                         | 0.1000101(60)                                            | 0.0999528(59) | 0.0999655(58) |
| 7                                         | 0.1000009(57)                                            | 0.0999448(57) | 0.0999582(57) |
| (Solutions -3b) 8                         | 0.0999952(65)                                            | 0.0999378(61) | 0.0999498(62) |
| 9                                         | 0.0999943(56)                                            | 0.0999387(61) | 0.0999541(56) |
| 10                                        | 0.0999989(63)                                            | 0.0999435(64) | 0.0999570(60) |
| Average                                   | 0.1000011(72)                                            | 0.0999442(72) | 0.0999577(71) |
| $s(x(^{25}\text{Mg})) / (\text{mol/mol})$ | 0.0000048                                                | 0.0000046     | 0.0000042     |
|                                           | $x(^{26}\text{Mg}) / (\text{mol/mol})$                   |               |               |
| (Solutions -1b) 1                         | 0.110107(15)                                             | 0.109955(15)  | 0.109985(15)  |
| 2                                         | 0.1101085(76)                                            | 0.1099534(79) | 0.1099789(74) |
| 3                                         | 0.1101129(83)                                            | 0.1099633(76) | 0.1099875(76) |
| (Solutions -2b) 4                         | 0.1100820(70)                                            | 0.1099305(72) | 0.1099570(72) |
| 5                                         | 0.1100866(88)                                            | 0.1099337(89) | 0.1099615(89) |
| 6                                         | 0.1100804(84)                                            | 0.1099292(78) | 0.1099558(74) |
| 7                                         | 0.1100783(82)                                            | 0.1099288(85) | 0.1099585(82) |
| (Solutions -3b) 8                         | 0.110092(10)                                             | 0.109941(10)  | 0.109966(10)  |
| 9                                         | 0.1100978(76)                                            | 0.1099465(77) | 0.1099760(76) |
| 10                                        | 0.1100897(73)                                            | 0.1099382(80) | 0.1099699(71) |
| Average                                   | 0.1100936(91)                                            | 0.1099419(91) | 0.1099696(91) |
| $s(x(^{26}\text{Mg})) / (\text{mol/mol})$ | 0.000012                                                 | 0.000012      | 0.000012      |
| <b>Isotope amount ratios</b>              |                                                          |               |               |
|                                           | $n(^{25}\text{Mg})/n(^{24}\text{Mg}) / (\text{mol/mol})$ |               |               |
| (Solutions -1b) 1                         | 0.126597(19)                                             | 0.126491(19)  | 0.126518(19)  |
| 2                                         | 0.1266027(89)                                            | 0.1264964(84) | 0.1265189(86) |
| 3                                         | 0.126610(10)                                             | 0.1265050(97) | 0.1265258(99) |
| (Solutions -2b) 4                         | 0.1266004(85)                                            | 0.1264939(83) | 0.1265177(84) |
| 5                                         | 0.126597(10)                                             | 0.126490(10)  | 0.126515(10)  |
| 6                                         | 0.1266095(87)                                            | 0.1265036(86) | 0.1265260(84) |
| 7                                         | 0.1265961(83)                                            | 0.1264922(83) | 0.1265161(83) |
| (Solutions -3b) 8                         | 0.1265902(93)                                            | 0.1264841(88) | 0.1265053(88) |
| 9                                         | 0.1265898(81)                                            | 0.1264863(88) | 0.1265130(82) |
| 10                                        | 0.1265951(91)                                            | 0.1264919(93) | 0.1265161(88) |
| Average                                   | 0.126599(10)                                             | 0.126493(10)  | 0.126517(10)  |
| $s(n(^{25}\text{Mg})/n(^{24}\text{Mg}))$  | 0.0000070                                                | 0.0000067     | 0.0000060     |

| <b>Isotope amount ratios</b>             |                                                          |                  |               |
|------------------------------------------|----------------------------------------------------------|------------------|---------------|
|                                          | $n(^{26}\text{Mg})/n(^{24}\text{Mg}) / (\text{mol/mol})$ |                  |               |
| (Solutions -1b) 1                        | 0.139395(21)                                             | 0.139165(21)     | 0.139211(22)  |
| 2                                        | 0.139397(11)                                             | 0.139164(11)     | 0.139203(11)  |
| 3                                        | 0.139405(12)                                             | 0.139179(11)     | 0.139216(11)  |
| (Solutions -2b) 4                        | 0.139359(10)                                             | 0.139131(10)     | 0.139171(11)  |
| 5                                        | 0.139365(13)                                             | 0.139135(13)     | 0.139177(13)  |
| 6                                        | 0.139358(12)                                             | 0.139130(11)     | 0.139171(11)  |
| 7                                        | 0.139354(12)                                             | 0.139128(12)     | 0.139173(12)  |
| (Solutions -3b) 8                        | 0.139373(15)                                             | 0.139144(15)     | 0.139183(15)  |
| 9                                        | 0.139381(11)                                             | 0.139153(11)     | 0.139198(11)  |
| 10                                       | 0.139370(11)                                             | 0.139141(12)     | 0.139190(10)  |
| Average                                  | 0.139376(13)                                             | 0.139147(13)     | 0.139189(13)  |
| $s(n(^{26}\text{Mg})/n(^{24}\text{Mg}))$ | 0.000018                                                 | 0.000017         | 0.000017      |
| <b>Relative atomic weights</b>           |                                                          | $A_r(\text{Mg})$ |               |
| (Solutions -1b) 1                        | 24.305064(31)                                            | 24.304703(30)    | 24.304778(31) |
| 2                                        | 24.305071(17)                                            | 24.304704(17)    | 24.304768(16) |
| 3                                        | 24.305084(18)                                            | 24.304728(17)    | 24.304789(17) |
| (Solutions -2b) 4                        | 24.305019(16)                                            | 24.304659(16)    | 24.304726(16) |
| 5                                        | 24.305025(20)                                            | 24.304662(20)    | 24.304732(20) |
| 6                                        | 24.305023(18)                                            | 24.304663(17)    | 24.304729(16) |
| 7                                        | 24.305009(18)                                            | 24.304654(18)    | 24.304727(18) |
| (Solutions -3b) 8                        | 24.305031(21)                                            | 24.304671(21)    | 24.304734(22) |
| 9                                        | 24.305042(17)                                            | 24.304684(17)    | 24.304758(17) |
| 10                                       | 24.305030(16)                                            | 24.304672(17)    | 24.304749(16) |
| Average                                  | 24.305040(20)                                            | 24.304680(19)    | 24.304749(19) |
| $s(A_r(\text{Mg}))$                      | 0.000025                                                 | 0.000024         | 0.000023      |

5

10



## S5 Discussion

Published fractionation laws and their conversion into equations of the same systematic:

$$5 \quad R_i = \frac{x_i}{x_1}$$

**Linear Law 1 (Taylor *et al.* [3]):**

$$\frac{R_2^{true}}{R_2^{meas}} = 1 + \Delta M_2 \times \varepsilon = 1 + (M_1 - M_2) \times \varepsilon$$

$$\frac{R_3^{true}}{R_3^{meas}} = 1 + \Delta M_3 \times \varepsilon = 1 + (M_1 - M_3) \times \varepsilon$$

$$\varepsilon = \frac{\frac{R_2^{true}}{R_2^{meas}} - 1}{M_1 - M_2}$$

$$\frac{R_3^{true}}{R_3^{meas}} = 1 + (M_1 - M_3) \times \frac{\frac{R_2^{true}}{R_2^{meas}} - 1}{M_1 - M_2}$$

$$\frac{R_3^{true}}{R_3^{meas}} = 1 + \frac{M_1 - M_3}{M_1 - M_2} \times \left( \frac{R_2^{true}}{R_2^{meas}} - 1 \right)$$

$$\frac{R_3^{true}}{R_3^{meas}} = 1 + \frac{M_3 - M_1}{M_2 - M_1} \times \left( \frac{R_2^{true}}{R_2^{meas}} - 1 \right)$$

$$R_3^{true} = R_3^{meas} \times \left[ 1 + \gamma \times \left( \frac{R_2^{true}}{R_2^{meas}} - 1 \right) \right]$$

**Linear Law 2 (Zindler and Hart [4]):**

$$R_3^{true} = R_3^{meas} \cdot \frac{\left( \frac{R_2^{true}}{R_2^{meas}} \right)}{\gamma + \left( \frac{R_2^{true}}{R_2^{meas}} \right) \cdot (1 - \gamma)}$$

$$\gamma = \frac{M_3 - M_1}{M_2 - M_1}$$

$$10 \quad R_3^{true} = R_3^{meas} \cdot \frac{K_2}{1 + \frac{K_2}{M_2 - M_1} \cdot \left( \frac{R_2^{true}}{R_2^{meas}} - 1 \right)}$$

$$R_3^{true} = R_3^{meas} \cdot \frac{K_2}{\frac{M_3 - M_1}{M_2 - M_1} + K_2 \cdot \left( 1 - \frac{M_3 - M_1}{M_2 - M_1} \right)}$$

or

$$R_3^{true} = R_3^{meas} \cdot \frac{1}{1 + \gamma \cdot \frac{R_2^{true}}{R_2^{meas}}}$$

$$R_3^{true} = R_3^{meas} \cdot \frac{1}{1 + \frac{M_3 - M_1}{M_2 - M_1} \cdot \frac{R_2^{meas} - R_2^{true}}{R_2^{true}}}$$

**Power Law (Zindler and Hart [4])**

$$R_3^{true} = R_3^{meas} \cdot \left( \frac{R_2^{true}}{R_2^{meas}} \right)^\gamma$$

$$15 \quad \gamma = \frac{M_3 - M_1}{M_2 - M_1}$$

$$R_3^{true} = R_3^{meas} \cdot \left( \frac{R_2^{true}}{R_2^{meas}} \right)^{\frac{M_3 - M_1}{M_2 - M_1}}$$

**Power Law (Taylor *et al.* [3])**

$$\frac{R_2^{true}}{R_2^{meas}} = (1 + \varepsilon)^{\Delta M_2} = (1 + \varepsilon)^{(M_1 - M_2)}$$

$$\left( \frac{R_2^{true}}{R_2^{meas}} \right)^{\frac{1}{M_1 - M_2}} = 1 + \varepsilon$$

$$\varepsilon = \left( \frac{R_2^{true}}{R_2^{meas}} \right)^{\frac{1}{M_1 - M_2}} - 1$$

$$\frac{R_3^{true}}{R_3^{meas}} = (1 + \varepsilon)^{(M_1 - M_3)}$$

$$\frac{R_3^{true}}{R_3^{meas}} = \left( 1 + \left( \frac{R_2^{true}}{R_2^{meas}} \right)^{\frac{1}{M_1 - M_2}} - 1 \right)^{(M_1 - M_3)}$$

$$\frac{R_3^{true}}{R_3^{meas}} = \left( \frac{R_2^{true}}{R_2^{meas}} \right)^{\frac{M_1 - M_3}{M_1 - M_2}}$$

$$\frac{R_3^{true}}{R_3^{meas}} = \left( \frac{R_2^{true}}{R_2^{meas}} \right)^{\frac{M_3 - M_1}{M_2 - M_1}}$$

Cite this: DOI: 10.1039/c0xx00000x

www.rsc.org/xxxxxx

**Exponential Law (Taylor *et al.* [3]):**

$$\frac{R_2^{true}}{R_2^{meas}} = e^{\varepsilon \times \Delta M_2} = e^{\varepsilon \times (M_1 - M_2)}$$

$$\frac{R_2^{true}}{R_2^{meas}} = (e^{\varepsilon})^{M_1 - M_2}$$

$$\left(\frac{R_2^{true}}{R_2^{meas}}\right)^{\frac{1}{M_1 - M_2}} = e^{\varepsilon}$$

$$\ln\left(\frac{R_2^{true}}{R_2^{meas}}\right)^{\frac{1}{M_1 - M_2}} = \ln e^{\varepsilon} = \varepsilon \times \ln e = \varepsilon$$

$$\frac{R_3^{true}}{R_3^{meas}} = e^{\varepsilon \times (M_1 - M_3)}$$

$$\frac{R_3^{true}}{R_3^{meas}} = e^{(M_1 - M_3) \times \ln\left(\frac{R_2^{true}}{R_2^{meas}}\right)^{\frac{1}{M_1 - M_2}}}$$

$$\frac{R_3^{true}}{R_3^{meas}} = e^{\ln\left(\frac{R_2^{true}}{R_2^{meas}}\right)^{\frac{M_1 - M_3}{M_1 - M_2}}}$$

$$\frac{R_3^{true}}{R_3^{meas}} = \left(\frac{R_2^{true}}{R_2^{meas}}\right)^{\frac{M_1 - M_3}{M_1 - M_2}}$$

$$\frac{R_3^{true}}{R_3^{meas}} = \left(\frac{R_2^{true}}{R_2^{meas}}\right)^{\frac{M_3 - M_1}{M_2 - M_1}}$$

$$R_3^{true} = R_3^{meas} \cdot \frac{\left(\sqrt{\frac{M_1}{M_2}}\right)^{\left(\frac{1 - \sqrt{\frac{M_1}{M_3}}}{1 - \sqrt{\frac{M_1}{M_2}}}\right)}}{\sqrt{\frac{M_1}{M_3}}} \cdot \left(\frac{R_2^{true}}{R_2^{meas}}\right)^{\left(\frac{1 - \sqrt{\frac{M_1}{M_3}}}{1 - \sqrt{\frac{M_1}{M_2}}}\right)}$$

**Exponential Law (Zindler and Hart [4])**

$$R_3^{true} = R_3^{meas} \cdot \left(\frac{R_2^{true}}{R_2^{meas}}\right)^{\gamma}$$

$$\gamma = \frac{\ln\left(\frac{M_3}{M_1}\right)}{\ln\left(\frac{M_2}{M_1}\right)}$$

$$R_3^{true} = R_3^{meas} \cdot \left(\frac{R_2^{true}}{R_2^{meas}}\right)^{\left(\frac{\ln\left(\frac{M_3}{M_1}\right)}{\ln\left(\frac{M_2}{M_1}\right)}\right)}$$

**Rayleigh Law (Zindler and Hart [4])**

$$R_3^{true} = R_3^{meas} \cdot \frac{\beta_2^{\gamma}}{\beta_3} \cdot \left(\frac{R_2^{true}}{R_2^{meas}}\right)^{\gamma}$$

$$\beta_3 = \sqrt{\frac{M_1}{M_3}} \quad \beta_2 = \sqrt{\frac{M_1}{M_2}}$$

$$\gamma = \frac{1 - \beta_3}{1 - \beta_2} = \frac{1 - \sqrt{\frac{M_1}{M_3}}}{1 - \sqrt{\frac{M_1}{M_2}}}$$

Cite this: DOI: 10.1039/c0xx00000x

**PAPER**

www.rsc.org/xxxxxx

**Russel's Law [5]:**

$$\frac{R_2^{\text{true}}}{R_2^{\text{meas}}} = \left( \frac{M_2}{M_1} \right)^\varepsilon$$

$$\ln \frac{R_2^{\text{true}}}{R_2^{\text{meas}}} = \ln \left( \frac{M_2}{M_1} \right)^\varepsilon = \varepsilon \times \ln \left( \frac{M_2}{M_1} \right)$$

$$\varepsilon = \frac{\ln \left( \frac{R_2^{\text{true}}}{R_2^{\text{meas}}} \right)}{\ln \left( \frac{M_2}{M_1} \right)}$$

$$\frac{R_3^{\text{true}}}{R_3^{\text{meas}}} = \left( \frac{M_3}{M_1} \right)^\varepsilon$$

$$\frac{R_3^{\text{true}}}{R_3^{\text{meas}}} = \left( \frac{M_3}{M_1} \right)^{\frac{\ln \left( \frac{R_2^{\text{true}}}{R_2^{\text{meas}}} \right)}{\ln \left( \frac{M_2}{M_1} \right)}}$$

$$\ln \left( \frac{R_3^{\text{true}}}{R_3^{\text{meas}}} \right) = \ln \left[ \left( \frac{M_3}{M_1} \right)^{\frac{\ln \left( \frac{R_2^{\text{true}}}{R_2^{\text{meas}}} \right)}{\ln \left( \frac{M_2}{M_1} \right)}} \right] = \frac{\ln \left( \frac{R_2^{\text{true}}}{R_2^{\text{meas}}} \right)}{\ln \left( \frac{M_2}{M_1} \right)} \times \ln \left( \frac{M_3}{M_1} \right)$$

$$\ln \left( \frac{R_3^{\text{true}}}{R_3^{\text{meas}}} \right) = \frac{\ln \left( \frac{M_3}{M_1} \right)}{\ln \left( \frac{M_2}{M_1} \right)} \times \ln \left( \frac{R_2^{\text{true}}}{R_2^{\text{meas}}} \right)$$

$$\ln \left( \frac{R_3^{\text{true}}}{R_3^{\text{meas}}} \right) = \ln \left[ \left( \frac{R_2^{\text{true}}}{R_2^{\text{meas}}} \right)^{\frac{\ln \left( \frac{M_3}{M_1} \right)}{\ln \left( \frac{M_2}{M_1} \right)}} \right]$$

$$\frac{R_3^{\text{true}}}{R_3^{\text{meas}}} = \left( \frac{R_2^{\text{true}}}{R_2^{\text{meas}}} \right)^{\frac{\ln \left( \frac{M_3}{M_1} \right)}{\ln \left( \frac{M_2}{M_1} \right)}}$$

Cite this: DOI: 10.1039/c0xx00000x

PAPER

www.rsc.org/xxxxxx

**Table S10**  $K$ -factor  $K_{26/24}$  calculated for different fractionation laws by using  $K_{2-02}$  ( $^{25}\text{Mg}/^{24}\text{Mg}$ ) as the input quantity and comparison with the reference  $K$ -factor  $K_{3-02}$  ( $^{26}\text{Mg}/^{24}\text{Mg}$ ) determined by using the synthetic isotope mixtures; expanded uncertainties ( $k = 2$ ) are given in brackets. The  $\Delta$  values reflect the difference between the  $K$ -factor calculated by using a specific fractionation law and the reference  $K$ -factor  $K_{3-02}$  expressed in ‰. The uncertainty of the  $\Delta$  values contain the uncertainties of the input quantity  $K_{2-02}$  ( $^{25}\text{Mg}/^{24}\text{Mg}$ ) and the uncertainty contributions deriving from the calculation by using the fractionation laws. Calculations were made for all sequences measured at three different institutes using three different MC-ICPMS instruments.

| Sequence | $K_{2-02}(25/24) /$<br>(V/V/mol/mol) | $K_{3-02}(26/24) /$<br>(V/V/mol/mol) | $K_{\text{lin1}}(26/24) /$<br>(V/V/mol/mol) | $\Delta_{\text{lin1-ref}} /$<br>‰ | $K_{\text{lin2}}(26/24) /$<br>(V/V/mol/mol) | $\Delta_{\text{lin2-ref}} /$<br>‰ | $K_{\text{pow}}(26/24) /$<br>(V/V/mol/mol) | $\Delta_{\text{pow-ref}} /$<br>‰ | $K_{\text{ray}}(26/24) /$<br>(V/V/mol/mol) | $\Delta_{\text{ray-ref}} /$<br>‰ | $K_{\text{exp}}(26/24) /$<br>(V/V/mol/mol) | $\Delta_{\text{exp-ref}} /$<br>‰ |
|----------|--------------------------------------|--------------------------------------|---------------------------------------------|-----------------------------------|---------------------------------------------|-----------------------------------|--------------------------------------------|----------------------------------|--------------------------------------------|----------------------------------|--------------------------------------------|----------------------------------|
| LGC 01   | 0.926828(86)                         | 0.86170(10)                          | 0.85395(17)                                 | -9.0(2.1)                         | 0.86387(15)                                 | 2.52(53)                          | 0.85927(16)                                | -2.82(62)                        | 0.86340(16)                                | 1.97(43)                         | 0.86183(16)                                | 0.149(33)                        |
| LGC 02   | 0.927411(81)                         | 0.86260(12)                          | 0.85511(16)                                 | -8.7(2.0)                         | 0.86488(14)                                 | 2.64(56)                          | 0.86035(15)                                | -2.61(58)                        | 0.86446(15)                                | 2.16(48)                         | 0.86289(15)                                | 0.336(75)                        |
| LGC 03   | 0.928081(93)                         | 0.86386(13)                          | 0.85645(19)                                 | -8.6(2.3)                         | 0.86605(16)                                 | 2.54(60)                          | 0.86159(17)                                | -2.63(65)                        | 0.86567(17)                                | 2.10(52)                         | 0.86411(17)                                | 0.289(72)                        |
| PTB 01   | 0.93339(13)                          | 0.87349(14)                          | 0.86705(26)                                 | -7.4(2.5)                         | 0.87532(23)                                 | 2.10(65)                          | 0.87146(24)                                | -2.32(74)                        | 0.87529(24)                                | 2.06(65)                         | 0.87381(24)                                | 0.37(12)                         |
| PTB 02   | 0.934042(59)                         | 0.874594(60)                         | 0.86835(12)                                 | -7.1(1.1)                         | 0.87647(10)                                 | 2.15(29)                          | 0.87267(11)                                | -2.20(32)                        | 0.87647(11)                                | 2.15(31)                         | 0.87500(11)                                | 0.464(67)                        |
| PTB 03   | 0.933638(59)                         | 0.873914(60)                         | 0.86754(12)                                 | -7.3(1.1)                         | 0.87576(10)                                 | 2.11(28)                          | 0.87192(11)                                | -2.28(33)                        | 0.87574(11)                                | 2.09(30)                         | 0.87426(11)                                | 0.396(57)                        |
| PTB 04   | 0.935489(71)                         | 0.877024(66)                         | 0.87124(14)                                 | -6.6(1.2)                         | 0.87901(13)                                 | 2.26(38)                          | 0.87538(13)                                | -1.87(31)                        | 0.87911(13)                                | 2.38(39)                         | 0.87766(13)                                | 0.73(12)                         |
| PTB 05   | 0.935638(66)                         | 0.87739(10)                          | 0.87154(13)                                 | -6.7(1.2)                         | 0.87927(12)                                 | 2.15(38)                          | 0.87565(12)                                | -1.98(35)                        | 0.87938(12)                                | 2.27(40)                         | 0.87793(12)                                | 0.62(11)                         |
| PTB 06   | 0.935528(58)                         | 0.877377(62)                         | 0.87132(12)                                 | -6.9(1.1)                         | 0.87908(10)                                 | 1.94(26)                          | 0.87545(11)                                | -2.20(32)                        | 0.87918(11)                                | 2.06(30)                         | 0.87773(11)                                | 0.403(58)                        |
| PTB 07   | 0.935311(78)                         | 0.877123(63)                         | 0.87088(16)                                 | -7.1(1.4)                         | 0.87870(14)                                 | 1.80(31)                          | 0.87504(15)                                | -2.38(44)                        | 0.87878(14)                                | 1.89(33)                         | 0.87733(14)                                | 0.236(41)                        |
| PTB 08   | 0.93524(12)                          | 0.87697(15)                          | 0.87074(24)                                 | -7.1(2.3)                         | 0.87857(21)                                 | 1.83(54)                          | 0.87491(22)                                | -2.35(71)                        | 0.87865(22)                                | 1.92(58)                         | 0.87720(22)                                | 0.264(80)                        |
| PTB 09   | 0.934954(66)                         | 0.876394(67)                         | 0.87017(13)                                 | -7.1(1.2)                         | 0.87807(12)                                 | 1.91(30)                          | 0.87438(12)                                | -2.30(36)                        | 0.87813(12)                                | 1.98(31)                         | 0.87668(12)                                | 0.326(51)                        |
| BAM 01   | 0.93436(14)                          | 0.87544(13)                          | 0.86898(28)                                 | -7.4(2.6)                         | 0.87702(25)                                 | 1.80(58)                          | 0.87327(26)                                | -2.48(82)                        | 0.87705(25)                                | 1.84(59)                         | 0.87559(26)                                | 0.171(57)                        |
| BAM 02   | 0.934198(61)                         | 0.875066(63)                         | 0.86866(12)                                 | -7.3(1.1)                         | 0.87674(11)                                 | 1.91(28)                          | 0.87297(11)                                | -2.40(35)                        | 0.87676(11)                                | 1.94(28)                         | 0.87529(11)                                | 0.256(37)                        |
| BAM 03   | 0.933474(71)                         | 0.873705(69)                         | 0.86722(14)                                 | -7.4(1.3)                         | 0.87547(12)                                 | 2.02(32)                          | 0.87162(13)                                | -2.39(40)                        | 0.87544(13)                                | 1.99(33)                         | 0.87396(13)                                | 0.292(49)                        |
| BAM 04   | 0.934165(60)                         | 0.874802(64)                         | 0.86860(12)                                 | -7.1(1.1)                         | 0.87668(11)                                 | 2.15(31)                          | 0.87290(11)                                | -2.17(32)                        | 0.87670(11)                                | 2.17(32)                         | 0.87523(11)                                | 0.489(71)                        |
| BAM 05   | 0.934635(75)                         | 0.875780(80)                         | 0.86953(15)                                 | -7.1(1.4)                         | 0.87751(13)                                 | 1.98(34)                          | 0.87378(14)                                | -2.28(42)                        | 0.87755(14)                                | 2.02(37)                         | 0.87609(14)                                | 0.354(65)                        |
| BAM 06   | 0.934772(62)                         | 0.875843(66)                         | 0.86981(12)                                 | -6.9(1.1)                         | 0.87775(11)                                 | 2.18(32)                          | 0.87404(12)                                | -2.06(32)                        | 0.87780(11)                                | 2.23(33)                         | 0.87634(11)                                | 0.567(83)                        |
| BAM 07   | 0.935150(60)                         | 0.876656(73)                         | 0.87056(12)                                 | -7.0(1.1)                         | 0.87841(11)                                 | 2.00(30)                          | 0.87474(11)                                | -2.19(33)                        | 0.87849(11)                                | 2.09(31)                         | 0.87704(11)                                | 0.438(66)                        |
| BAM 08   | 0.934933(64)                         | 0.876466(91)                         | 0.87013(13)                                 | -7.2(1.3)                         | 0.87803(11)                                 | 1.78(29)                          | 0.87434(12)                                | -2.43(42)                        | 0.87810(12)                                | 1.86(32)                         | 0.87664(12)                                | 0.199(34)                        |
| BAM 09   | 0.935103(60)                         | 0.876809(68)                         | 0.87047(12)                                 | -7.2(1.1)                         | 0.87833(11)                                 | 1.73(26)                          | 0.87465(11)                                | -2.46(36)                        | 0.87840(11)                                | 1.81(27)                         | 0.87695(11)                                | 0.161(24)                        |
| BAM 10   | 0.935268(64)                         | 0.876997(65)                         | 0.87080(13)                                 | -7.1(1.2)                         | 0.87862(11)                                 | 1.85(27)                          | 0.87496(12)                                | -2.32(36)                        | 0.87871(12)                                | 1.95(30)                         | 0.87725(12)                                | 0.288(45)                        |

Cite this: DOI: 10.1039/c0xx00000x

**PAPER**

[www.rsc.org/xxxxxx](http://www.rsc.org/xxxxxx)

---

## Notes and references

<sup>a</sup> BAM Federal Institute for Materials Research and Testing,  
Unter den Eichen 87, 12205 Berlin, Germany.

E-mail: [jochen.vogl@bam.de](mailto:jochen.vogl@bam.de)

5 <sup>b</sup> Physikalisch-Technische Bundesanstalt (PTB), Bundesallee 100,  
38116 Braunschweig, Germany. E-mail: [olaf.rienitz@ptb.de](mailto:olaf.rienitz@ptb.de)

<sup>c</sup> LGC Limited, Queens Road, Teddington, Middlesex, TW11 0LY,  
United Kingdom. E-mail: [dmitriy.malinovskiy@lgcgroup.com](mailto:dmitriy.malinovskiy@lgcgroup.com)

- 10 1 G. Mana and O. Rienitz, *Int. J. Mass Spectrom.*, 2010, **291**, 55.  
2 A. Pramann, O. Rienitz, J. Noordmann, B. Güttler and D. Detlef  
Schiel, *Zeitschrift für Physikalische Chemie*, 2014, **228**, 405.  
3 P. D. P Taylor, P. Debievre, A. J. Walder, A. Entwistle, *J. Anal. At.*  
*Spectrom.*, 1995, **10**, 395.  
15 4 S. R. Hart, A. Zindler, A., *Int. J. Mass Spectrom. Ion Proc.*, 1989, **89**,  
287.  
5 J. Meija, L. Yang, Z. Mester and R. Sturgeon, "Correction of  
Instrumental Mass Discrimination for Isotope Ratio Determination  
with Multi-Collector Inductively Coupled Plasma Mass  
Spectrometry," in *Isotopic Analysis*, Weinheim, Wiley-VCH Verlag  
20 & Co KGaA, 2012, pp. 113-138.
